# Supplementary material for: Copper-catalyzed aerobic synthesis of bisaryl ketones from alkynes via the cleavage of C–C triple bonds
Source: Royal Society of Chemistry journal article supplement (doi:10.1039/c4ra06460g), 2014-12-01
Supplement: c4ra06460g1.pdf [file c4ra06460g1.pdf]

## Supporting Information

### List of Contents

- (A) Materials and equipment
- (B) Typical experimental procedure
- (C) Analytical data
- (D) References
- (E) Spectra

## (A) Materials and equipment

Reagents were obtained commercially and used as received. Solvents were purified and dried by standard methods.  $^1\text{H}$  NMR spectra were recorded on a Bruker-400 NMR spectrometer using TMS as an internal standard. Chemical shift values ( $\delta$ ) are given in ppm. Coupling constants ( $J$ ) were measured in Hz. GC-MS analyses were performed on a SHIMADZU QP2010. High Resolution mass spectrometer (HRMS) spectra were recorded on a Bruker micrOTOF-Q II analyzer. 200-300 mesh silica gel was used for column chromatography.

## (B) Typical experimental procedure

### Typical Experimental Procedure for the Synthesis of ketones

An oven-dried Schlenk tube was charged with a magnetic stir-bar, 1,2-diarylalkynes **1** (0.5 mmol), aniline (0.6 mmol),  $\text{K}_2\text{CO}_3$  (0.5 mmol),  $\text{Cu}(\text{OAc})_2$  (0.075 mmol), DMSO (3 mL), The tube was sealed, and oxygen was purged through syringe. Reaction was stirred at 120 °C for 16-18 h. After the reaction was finished, the reaction mixture was diluted in 30 mL ethyl acetate, filtered on celite pad. The organic portion was washed with a saturated solution of brine (8 mL), saturated  $\text{NH}_4\text{Cl}$  (8 mL), a saturated solution of brine (8 mL), dried ( $\text{Na}_2\text{SO}_4$ ) and concentrated in vacuum, and the resulting residue was purified by silica gel column chromatography (hexane/ethyl acetate) to afford the desired products **2**.

## (C) Analytical data

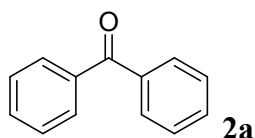

### Benzophenone (2a): $^1$

$^1\text{H}$  NMR (400 MHz,  $\text{CDCl}_3$ )  $\delta$ : 7.83 (dd,  $J = 8.0$  Hz,  $J = 1.6$  Hz, 4H), 7.61-7.56 (m, 2H), 7.51-7.45 (m, 4H);  $^{13}\text{C}$  NMR (100 MHz,  $\text{CDCl}_3$ )  $\delta$ : 196.7, 137.8, 132.5, 130.2, 128.4; IR (neat  $\text{cm}^{-1}$ ): 1660 (C=O); LRMS (EI 70 eV)  $m/z$  (%): 182 ( $\text{M}^+$ , 100); HRMS  $m/z$  (ESI) calcd for  $\text{C}_{13}\text{H}_{10}\text{O}$  ( $\text{M}+\text{H}$ ) $^+$  183.0804, found 183.0801.

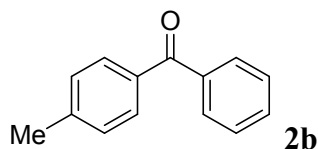

### Phenyl(p-tolyl)methanone (2b): $^1$

$^1\text{H}$  NMR (400 MHz,  $\text{CDCl}_3$ )  $\delta$ : 7.79 (d,  $J = 7.2$  Hz, 2H), 7.73 (d,  $J = 8.0$  Hz, 2H), 7.59 (t,  $J = 7.4$

Hz, 1H), 7.48 (t,  $J = 7.6$  Hz, 2H), 7.28 (d,  $J = 8.0$  Hz, 2H), 2.43 (s, 3H);  $^{13}\text{C}$  NMR (100 MHz,  $\text{CDCl}_3$ )  $\delta$ : 196.4, 143.2, 137.9, 134.8, 132.1, 130.2, 129.8, 128.9, 128.1, 21.6; IR (neat  $\text{cm}^{-1}$ ): 1658 (C=O); LRMS (EI 70 eV)  $m/z$  (%): 196 ( $\text{M}^+$ , 100); HRMS  $m/z$  (ESI) calcd for  $\text{C}_{14}\text{H}_{13}\text{O}$  ( $\text{M}+\text{H}$ ) $^+$  197.0960, found 197.0963.

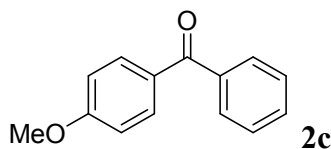

**(4-Methoxyphenyl)(phenyl)methanone (2c):**  $^1$

$^1\text{H}$  NMR (400 MHz,  $\text{CDCl}_3$ )  $\delta$ : 7.80 (d,  $J = 8.4$  Hz, 2H), 7.73 (d,  $J = 8.0$  Hz, 2H), 7.51-7.45 (m, 3H), 6.96 (d,  $J = 8.4$  Hz, 2H), 3.91 (s, 3H);  $^{13}\text{C}$  NMR (100 MHz,  $\text{CDCl}_3$ )  $\delta$ : 197.1, 163.2, 138.2, 132.4, 131.7, 130.0, 129.5, 128.2, 113.6, 55.8; IR (neat  $\text{cm}^{-1}$ ): 1652 (C=O); LRMS (EI 70 eV)  $m/z$  (%): 212 ( $\text{M}^+$ , 100); HRMS  $m/z$  (ESI) calcd for  $\text{C}_{14}\text{H}_{13}\text{O}_2$  ( $\text{M}+\text{H}$ ) $^+$  213.0909, found 213.0913.

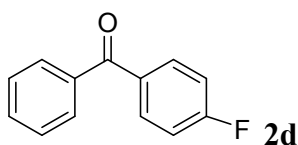

**(4-Fluorophenyl)(phenyl)methanone (2d):**  $^1$

$^1\text{H}$  NMR (400 MHz,  $\text{CDCl}_3$ )  $\delta$ : 7.86-7.83 (m, 2H), 7.78 (d,  $J = 4.2$  Hz, 2H), 7.62 (dd,  $J = 7.2$  Hz,  $J = 1.2$  Hz, 1H), 7.51 (t,  $J = 7.6$  Hz, 2H), 7.18 (t,  $J = 8.6$  Hz, 2H);  $^{13}\text{C}$  NMR (100 MHz,  $\text{CDCl}_3$ )  $\delta$ : 195.5, 165.5, 162.9, 137.6, 132.7, 132.7, 132.6, 132.4, 132.0, 129.8, 128.3, 115.5, 115.3; IR (neat  $\text{cm}^{-1}$ ): 1661 (C=O); LRMS (EI 70 eV)  $m/z$  (%): 200 ( $\text{M}^+$ , 100); HRMS  $m/z$  (ESI) calcd for  $\text{C}_{13}\text{H}_{10}\text{FO}$  ( $\text{M}+\text{H}$ ) $^+$  201.0710, found 201.0719.

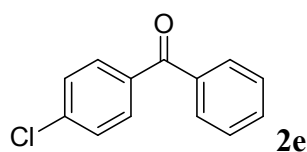

**(4-Chlorophenyl)(phenyl)methanone (2e):**  $^1$

$^1\text{H}$  NMR (400 MHz,  $\text{CDCl}_3$ )  $\delta$ : 7.78 (t,  $J = 7.2$  Hz, 4H), 7.62 (t,  $J = 7.4$  Hz, 1H), 7.50 (dd,  $J = 7.6$  Hz,  $J = 8.4$  Hz, 4H);  $^{13}\text{C}$  NMR (100 MHz,  $\text{CDCl}_3$ )  $\delta$ : 195.4, 138.8, 137.2, 135.8, 132.6, 131.4, 129.9, 128.6, 128.3; IR (neat  $\text{cm}^{-1}$ ): 1664 (C=O); LRMS (EI 70 eV)  $m/z$  (%): 218 (41), 216 ( $\text{M}^+$ , 100); HRMS  $m/z$  (ESI) calcd for  $\text{C}_{13}\text{H}_{10}\text{ClO}$  ( $\text{M}+\text{H}$ ) $^+$  217.0415, found 217.0410.

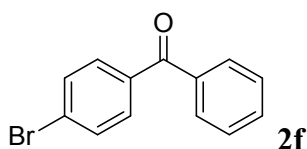

**(4-Bromophenyl)(phenyl)methanone (2f):** <sup>1</sup>

<sup>1</sup>H NMR (400 MHz, CDCl<sub>3</sub>)  $\delta$ : 7.78 (t,  $J = 4.2$  Hz, 2H), 7.69 (dd,  $J = 2.0$  Hz,  $J = 2.0$  Hz, 2H), 7.64-7.58 (m, 3H), 7.51 (t,  $J = 7.6$  Hz, 2H); <sup>13</sup>C NMR (100 MHz, CDCl<sub>3</sub>)  $\delta$ : 195.6, 137.1, 136.3, 132.6, 131.6, 131.5, 129.9, 128.4, 127.5; IR (neat cm<sup>-1</sup>): 1659 (C=O); LRMS (EI 70 ev)  $m/z$  (%): 260 (M<sup>+</sup>, 100), 258 (81); HRMS  $m/z$  (ESI) calcd for C<sub>13</sub>H<sub>10</sub>BrO (M+H)<sup>+</sup> 260.9909, found 260.9913.

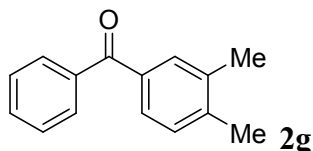

**(3,4-Dimethylphenyl)(phenyl)methanone (2g):** <sup>2</sup>

<sup>1</sup>H NMR (400 MHz, CDCl<sub>3</sub>)  $\delta$ : 7.79 (t,  $J = 4.2$  Hz, 2H), 7.61 (s, 1H), 7.59-7.52 (m, 2H), 7.49 (t,  $J = 7.6$  Hz, 2H), 7.23 (d,  $J = 7.6$  Hz, 1H), 2.35 (s, 3H), 2.32 (s, 3H); <sup>13</sup>C NMR (100 MHz, CDCl<sub>3</sub>)  $\delta$ : 198.3, 141.9, 138.0, 136.7, 135.3, 132.0, 131.1, 129.9, 129.4, 128.1, 128.0, 20.0, 19.7; IR (neat cm<sup>-1</sup>): 1661 (C=O); LRMS (EI 70 ev)  $m/z$  (%): 210 (M<sup>+</sup>, 100); HRMS  $m/z$  (ESI) calcd for C<sub>15</sub>H<sub>15</sub>O (M+H)<sup>+</sup> 211.1116, found 211.1111.

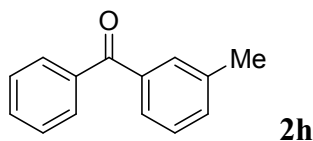

**Phenyl(m-tolyl)methanone (2h):** <sup>3</sup>

<sup>1</sup>H NMR (400 MHz, CDCl<sub>3</sub>)  $\delta$ : 7.81 (dd,  $J = 1.2$  Hz,  $J = 8.4$  Hz, 2H), 7.62-7.57 (m, 3H), 7.46-7.40 (m, 2H), 7.38 (dd,  $J = 4.4$  Hz,  $J = 4.4$  Hz, 2H), 2.41 (s, 3H); <sup>13</sup>C NMR (100 MHz, CDCl<sub>3</sub>)  $\delta$ : 196.8, 138.1, 137.4, 137.1, 133.0, 132.1, 130.6, 130.1, 128.4, 128.0, 127.2, 21.3; IR (neat cm<sup>-1</sup>): 1663 (C=O); LRMS (EI 70 ev)  $m/z$  (%): 196 (M<sup>+</sup>, 100); HRMS  $m/z$  (ESI) calcd for C<sub>14</sub>H<sub>13</sub>O (M+H)<sup>+</sup> 197.0960, found 197.0954.

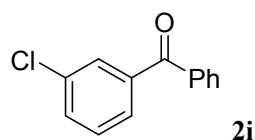

**(3-Chlorophenyl)(phenyl)methanone (2i):** <sup>1</sup>

<sup>1</sup>H NMR (400 MHz, CDCl<sub>3</sub>)  $\delta$ : 7.80-7.71 (m, 3H), 7.68-7.65 (m, 1H), 7.63-7.59 (m, 1H), 7.56-7.54 (m, 1H), 7.51 (dd,  $J = 4.8$  Hz,  $J = 4.0$  Hz, 2H), 7.43 (dd,  $J = 6.0$  Hz,  $J = 6.4$  Hz, 1H); <sup>13</sup>C NMR (100 MHz, CDCl<sub>3</sub>)  $\delta$ : 195.5, 139.4, 137.0, 135.2, 133.0, 132.6, 130.2, 130.0, 129.6, 128.4, 128.1; IR (neat cm<sup>-1</sup>): 1657 (C=O); LRMS (EI 70 ev)  $m/z$  (%): 218 (36), 216 (M<sup>+</sup>, 90); HRMS  $m/z$  (ESI) calcd for C<sub>13</sub>H<sub>10</sub>ClO (M+H)<sup>+</sup> 217.0415, found 217.0421.

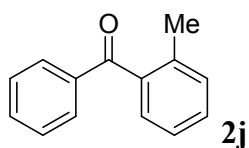

**Phenyl(o-tolyl)methanone (2j):** <sup>1</sup>

<sup>1</sup>H NMR (400 MHz, CDCl<sub>3</sub>)  $\delta$ : 7.74 (d,  $J$  = 7.2 Hz, 2H), 7.54-7.50 (m, 1H), 7.43-7.36 (m, 2H), 7.33-7.26 (m, 1H), 7.25-7.20 (m, 3H); 2.33 (s, 3H); <sup>13</sup>C NMR (100 MHz, CDCl<sub>3</sub>)  $\delta$ : 198.5, 138.8, 138.1, 137.0, 133.5, 131.7, 130.6, 130.3, 129.0, 128.8, 125.4, 20.4; IR (neat cm<sup>-1</sup>): 1647 (C=O); LRMS (EI 70 ev)  $m/z$  (%): 196 (M<sup>+</sup>, 100); HRMS  $m/z$  (ESI) calcd for C<sub>14</sub>H<sub>13</sub>O (M+H)<sup>+</sup> 197.0960, found 197.0961.

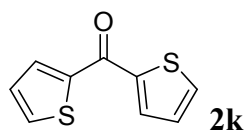

**Dithiophen-2-ylmethanone (2k):** <sup>4</sup>

<sup>1</sup>H NMR (400 MHz, CDCl<sub>3</sub>)  $\delta$ : 8.08 (dd,  $J$  = 4.0 Hz,  $J$  = 1.2 Hz, 2H), 7.86 (dd,  $J$  = 4.8 Hz,  $J$  = 1.2 Hz, 2H), 7.22-7.17 (m, 2H); <sup>13</sup>C NMR (100 MHz, CDCl<sub>3</sub>)  $\delta$ : 182.8, 138.5, 137.3, 137.0, 128.6; 1631 (C=O); LRMS (EI 70 ev)  $m/z$  (%): 194 (M<sup>+</sup>, 100); HRMS  $m/z$  (ESI) calcd for C<sub>9</sub>H<sub>7</sub>OS<sub>2</sub> (M+H)<sup>+</sup> 194.9932, found 194.9936.

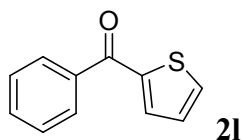

**Phenyl(thiophen-2-yl)methanone (2l):** <sup>5</sup>

<sup>1</sup>H NMR (400 MHz, CDCl<sub>3</sub>)  $\delta$ : 7.87 (d,  $J$  = 7.6 Hz, 2H), 7.73 (d,  $J$  = 4.8 Hz, 1H), 7.65 (d,  $J$  = 3.6 Hz, 1H), 7.61 (t,  $J$  = 7.4 Hz, 1H), 7.51 (t,  $J$  = 7.8 Hz, 2H), 7.17 (t,  $J$  = 4.4 Hz, 1H); <sup>13</sup>C NMR (100 MHz, CDCl<sub>3</sub>)  $\delta$ : 188.2, 143.6, 138.1, 134.8, 134.1, 132.2, 129.1, 128.3, 127.9; IR (neat cm<sup>-1</sup>): 1638 (C=O); LRMS (EI 70 ev)  $m/z$  (%): 188 (M<sup>+</sup>, 100); HRMS  $m/z$  (ESI) calcd for C<sub>11</sub>H<sub>9</sub>OS (M+H)<sup>+</sup> 189.0368, found 189.0361.

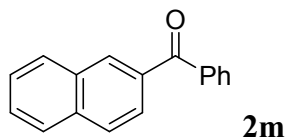

**2-Naphthylphenone (2m):** <sup>6</sup>

$^1\text{H}$  NMR (400 MHz,  $\text{CDCl}_3$ )  $\delta$ : 8.26 (s, 1H), 7.95-7.91 (m, 4H), 7.87-7.84 (m, 2H), 7.65-7.60 (m, 2H), 7.57-7.50 (m, 3H);  $^{13}\text{C}$  NMR (100 MHz,  $\text{CDCl}_3$ )  $\delta$ : 196.5, 137.7, 135.2, 134.3, 132.3, 132.2, 131.7, 130.2, 129.2, 128.3, 128.1, 128.0, 127.5, 126.7, 125.4; IR (neat  $\text{cm}^{-1}$ ): 1666 (C=O); LRMS (EI 70 eV)  $m/z$  (%): 232 ( $\text{M}^+$ , 100); HRMS  $m/z$  (ESI) calcd for  $\text{C}_{17}\text{H}_{13}\text{O}$  ( $\text{M}+\text{H}$ ) $^+$  233.7973, found 233.7970.

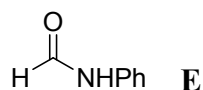

#### **N-phenylformamide (E) : <sup>7</sup>**

$^1\text{H}$  NMR (400 MHz,  $\text{CDCl}_3$ )  $\delta$ : 8.71 (d,  $J = 8.0$  Hz, 1H), 8.40 (brs, 1H), 7.55-7.52 (m, 1H), 7.38-7.32 (m, 2H), 7.21 (t,  $J = 6.6$  Hz, 1H), 7.12-7.08 (m, 1H);  $^{13}\text{C}$  NMR (100 MHz,  $\text{CDCl}_3$ )  $\delta$ : 162.5, 136.4, 129.7, 125.3, 118.6.

#### **(D) References**

- 1 M. Li, C. Wang and H. Ge, *Org. Lett.*, 2011, **13**, 2062.
- 2 K. P. Boroujeni, *Chin. Chem. Lett.* 2010, **21**, 1395.
- 3 M. Cai, G. Zheng, L. Zhang and J. Peng, *Eur. J. Org. Chem.*, 2009, **2009**, 1585.
- 4 A. Maji, S. Rana, Akanksha and D. Maiti, *Angew. Chem. Int. Ed.*, 2014, **53**, 2428.
- 5 B. Xin, Y. Zhang and K. Cheng, *J. Org. Chem.*, 2006, **71**, 5725.
- 6 K. Ekoue-Kovi, H. Xu and C. Wolf, *Tetrahedron Lett.*, 2008, **49**, 5773.
- 7 F. Ma, X. Xie, L. Zhang, Z. Peng, L. Ding, L. Fu and L. Zhang, *J. Org. Chem.*, 2012, **77**, 5279.

#### **(E) Spectra**

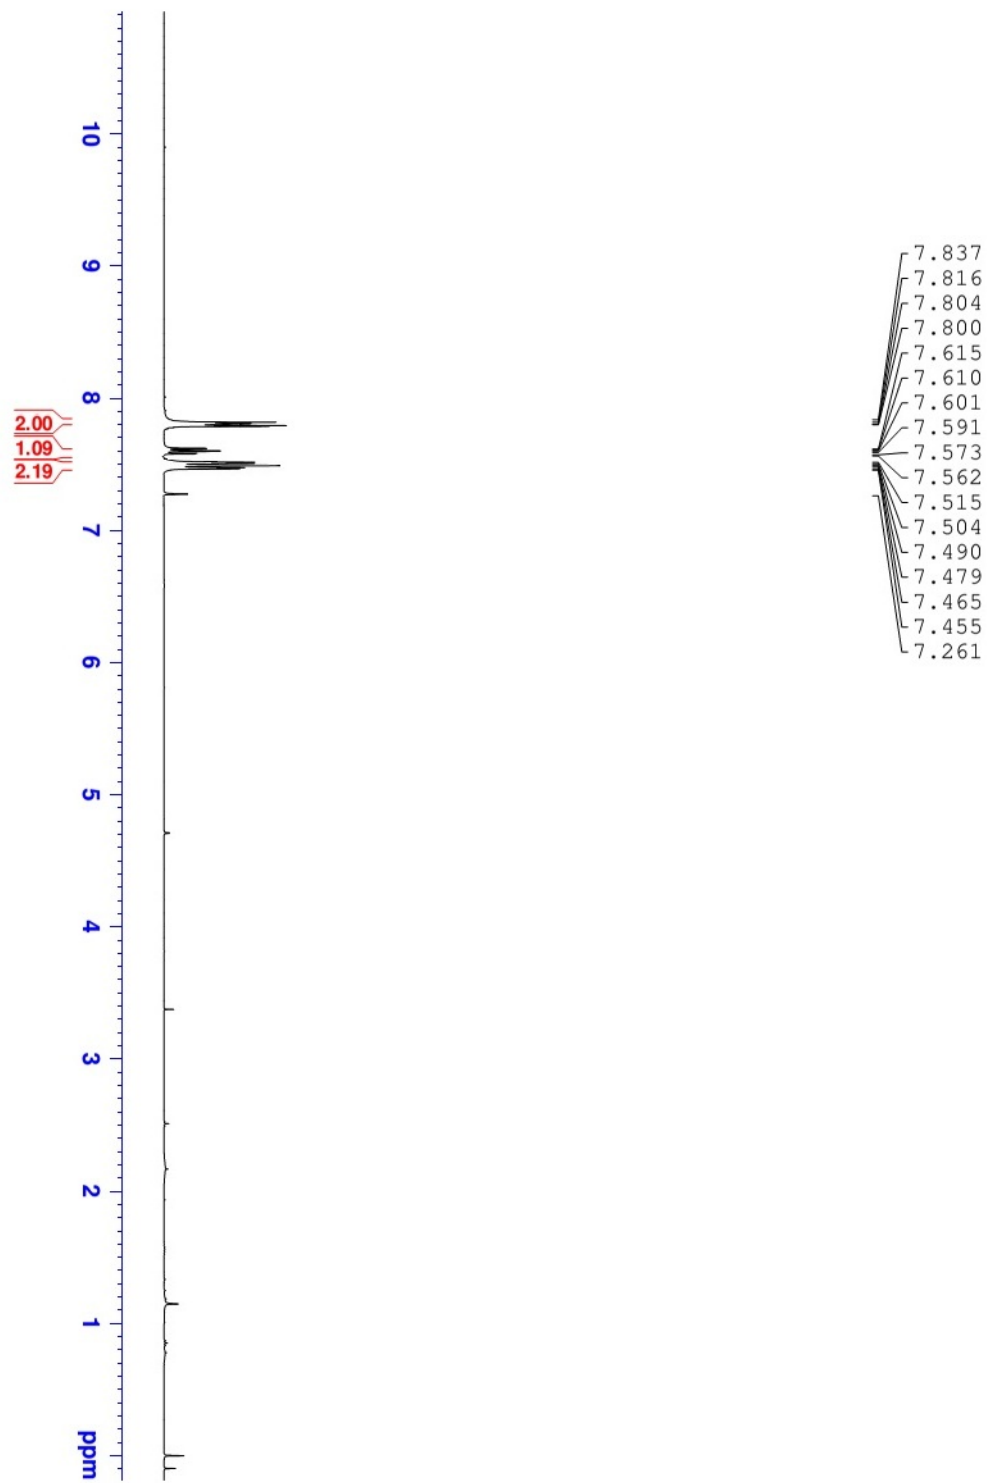

<sup>1</sup>H NMR of Compound 2a

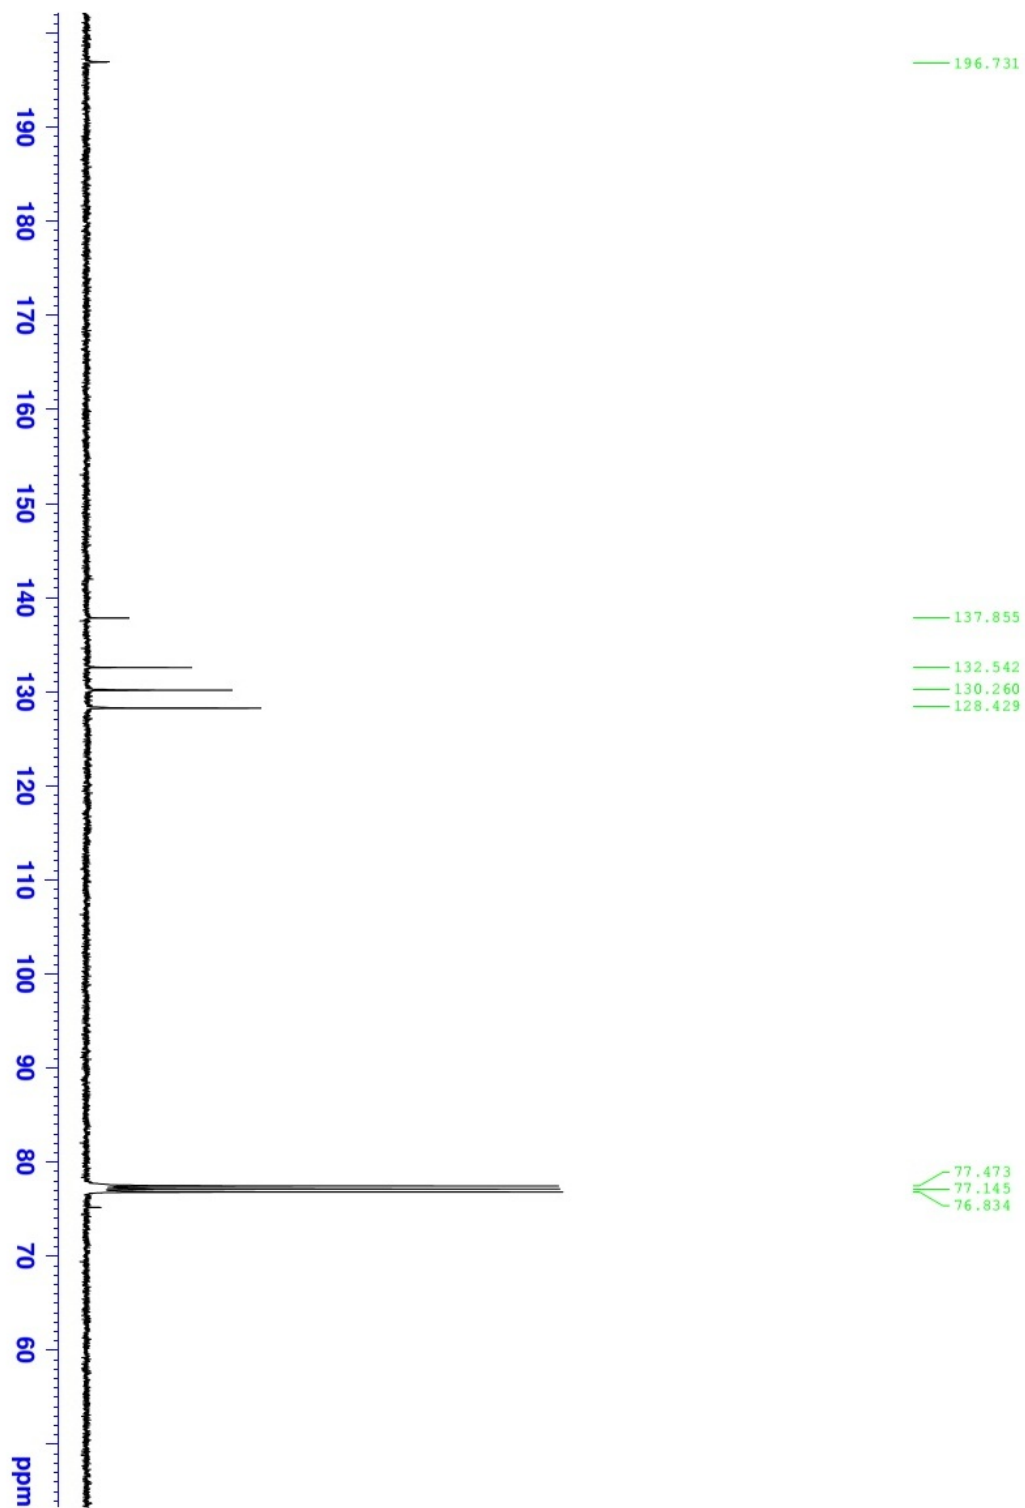

$^{13}\text{C}$  NMR of Compound 2a



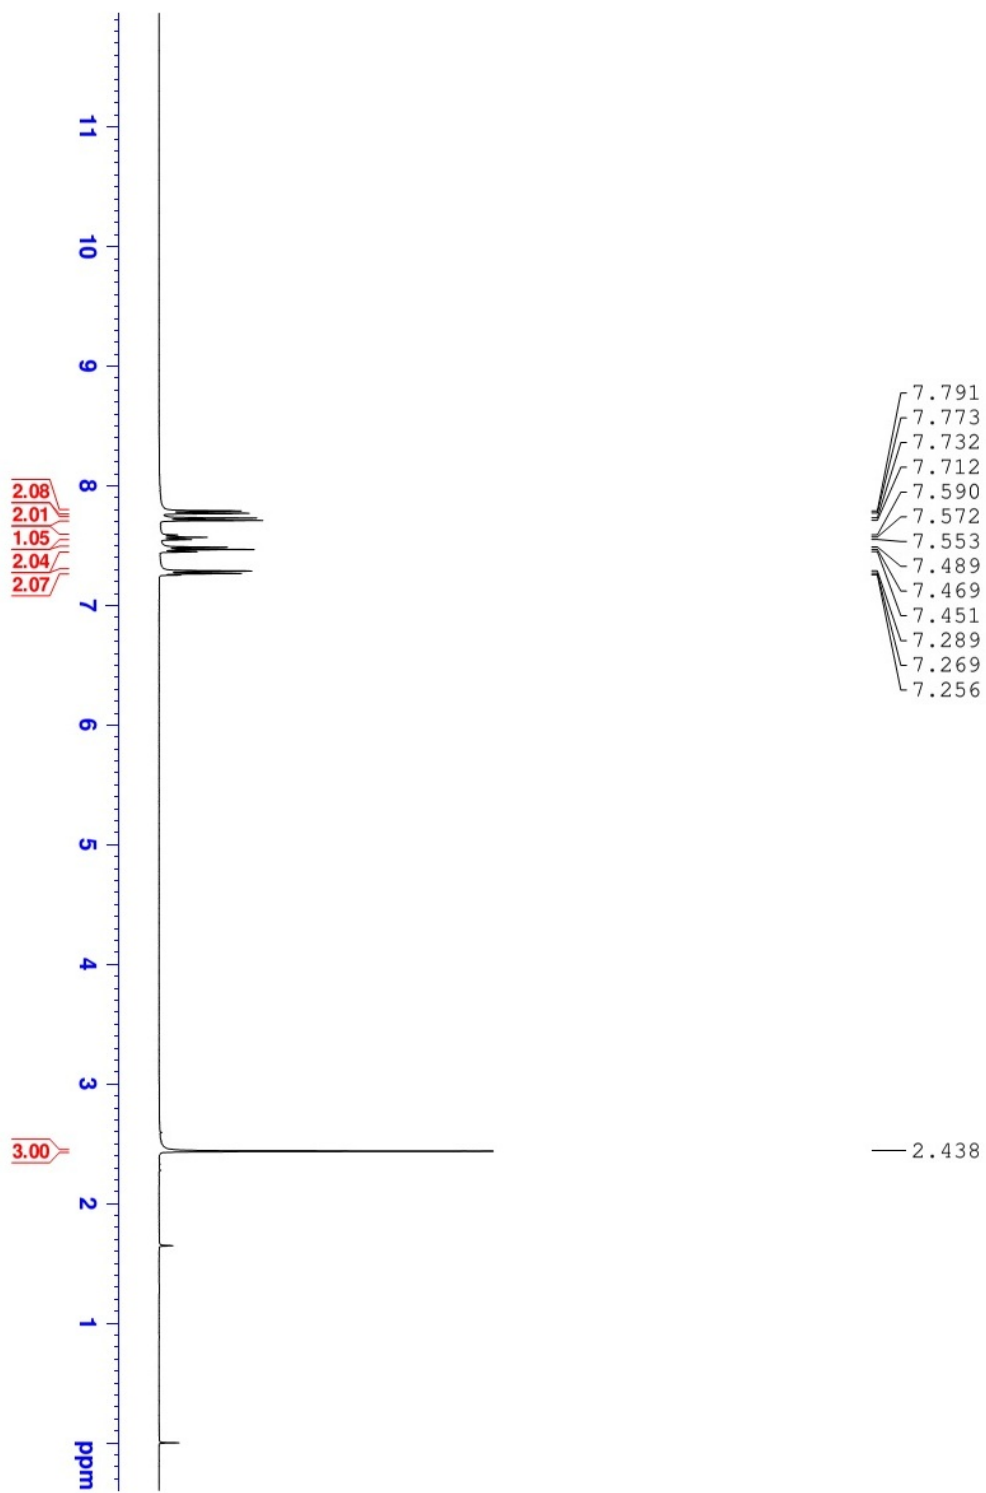

$^1\text{H}$  NMR of Compound 2b

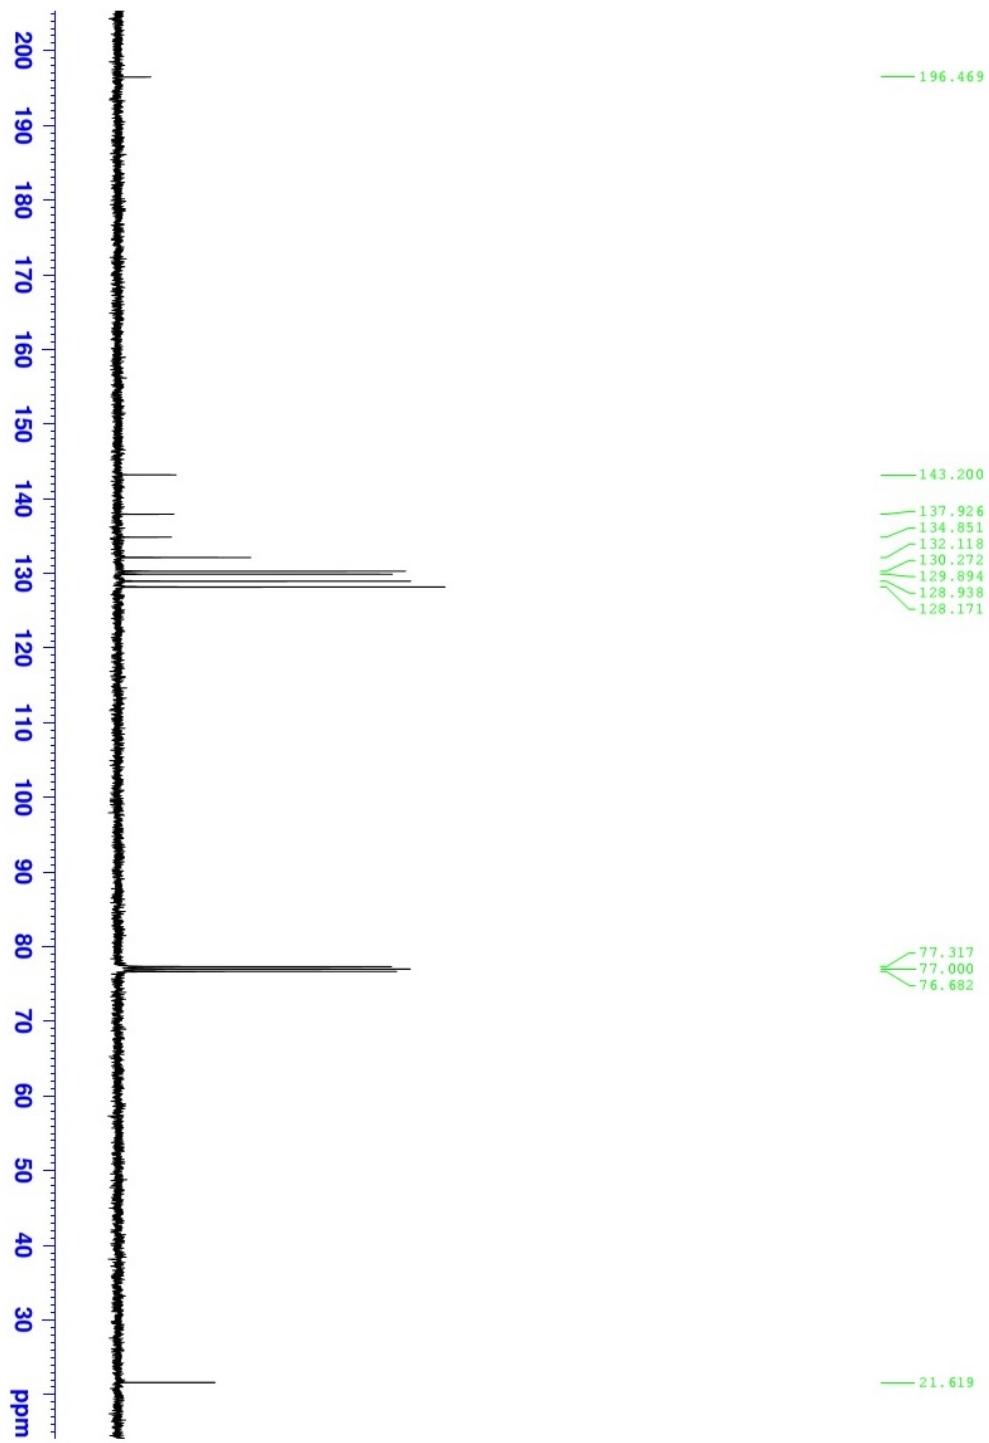

<sup>13</sup>C NMR of Compound 2b

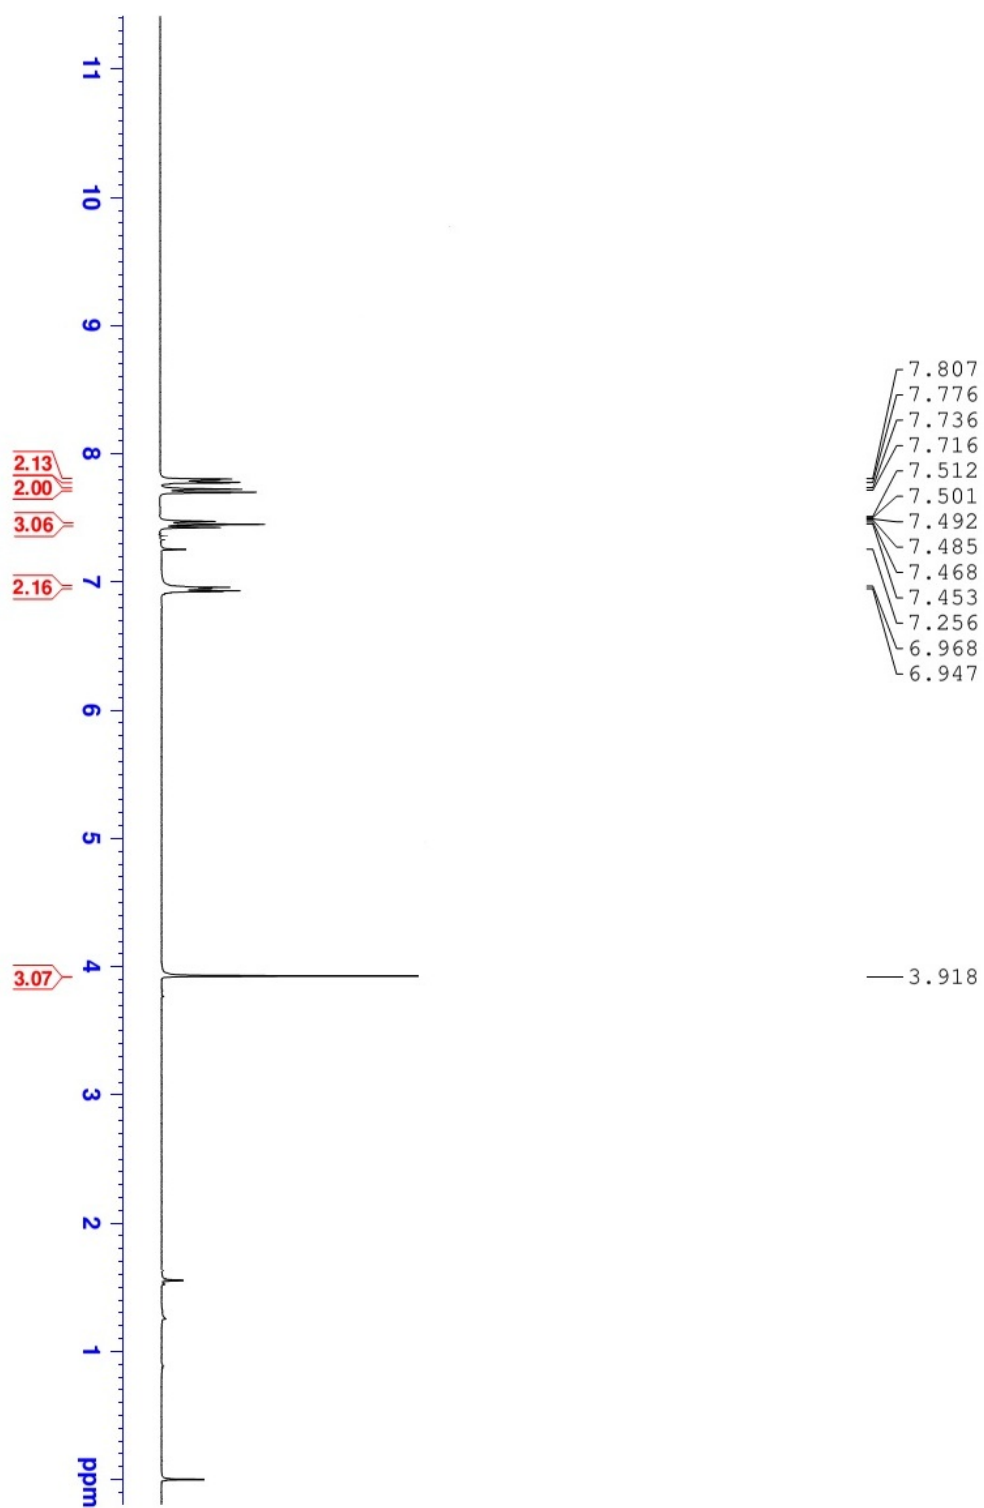

<sup>1</sup>H NMR of Compound 2c

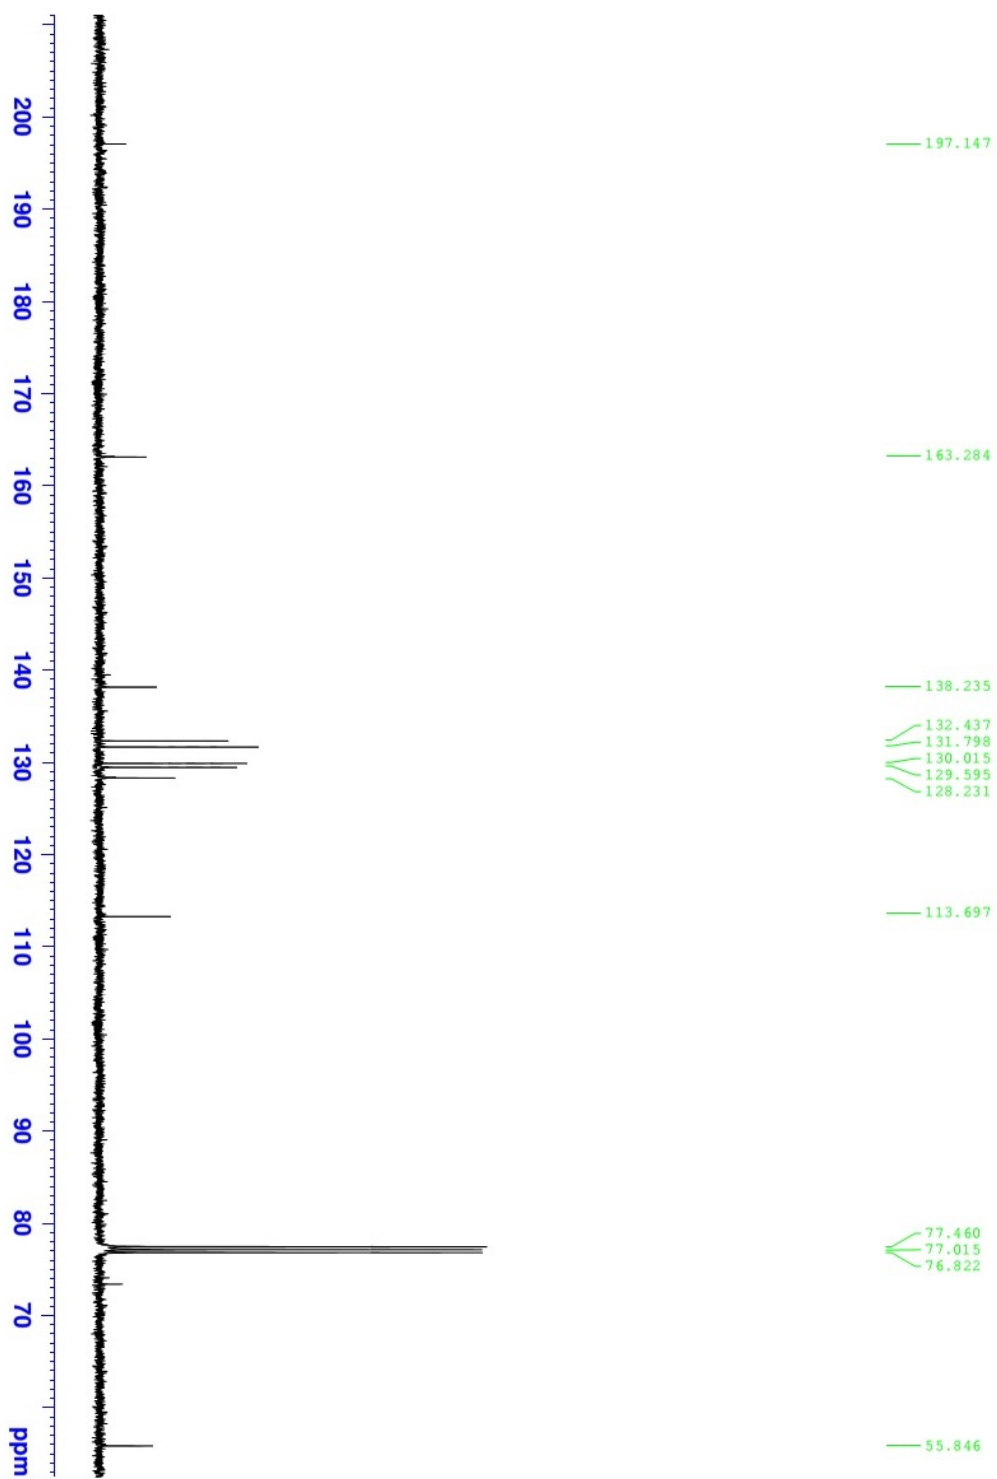

$^{13}\text{C}$  NMR of Compound 2c

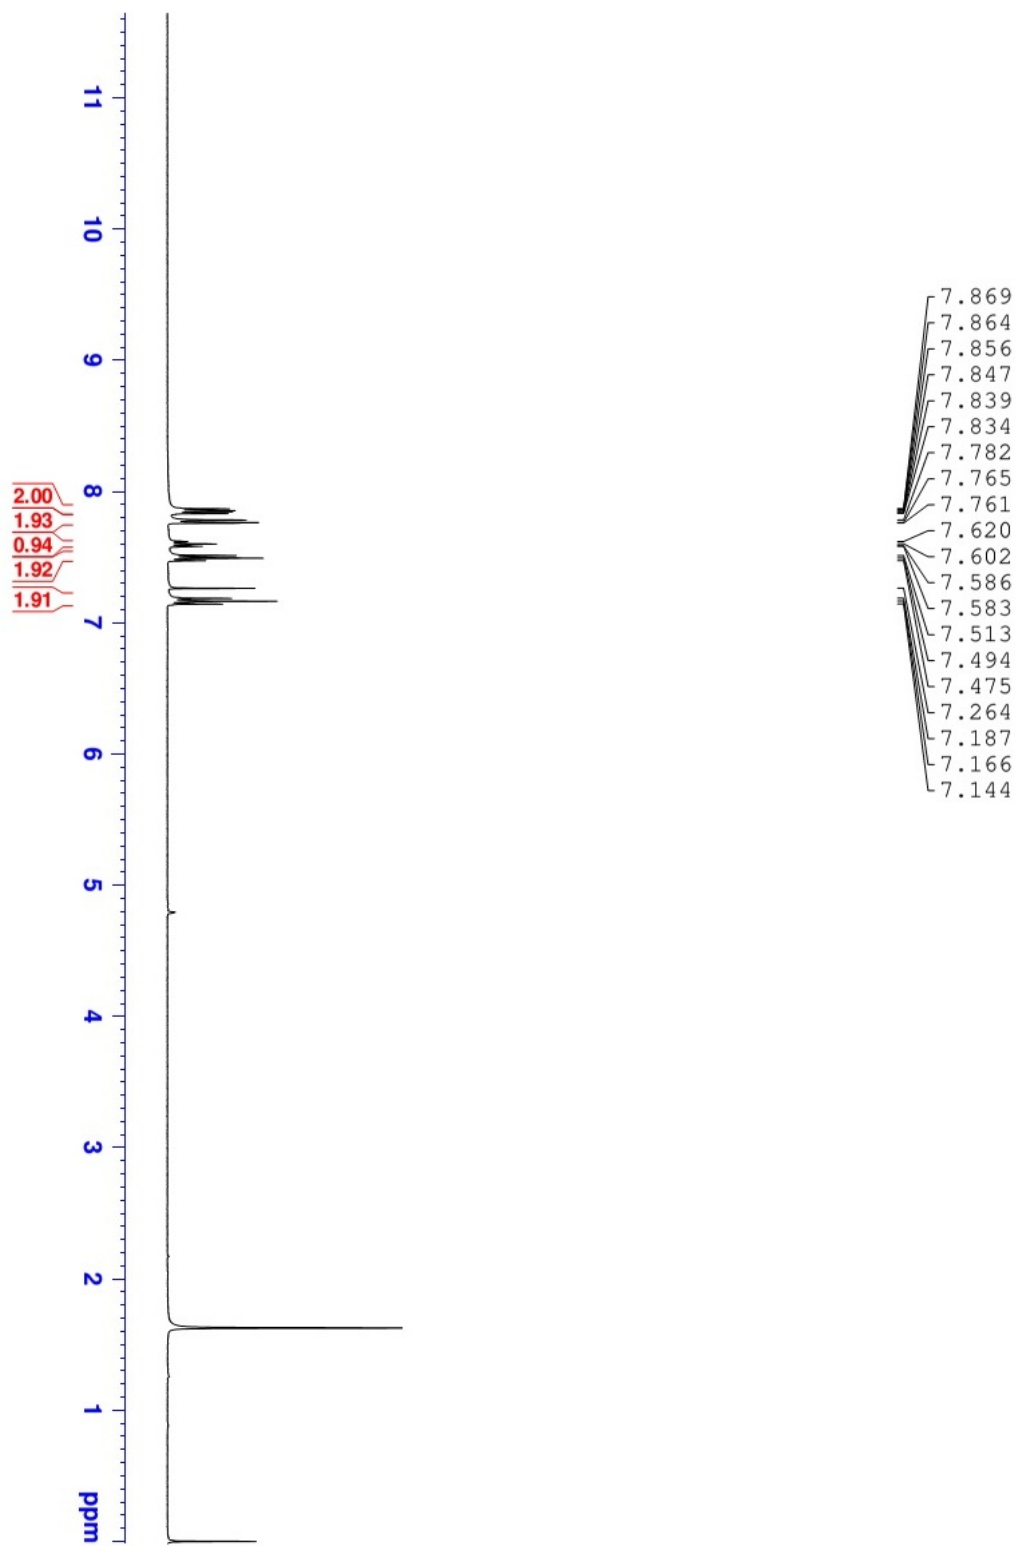

<sup>1</sup>H NMR of Compound 2d

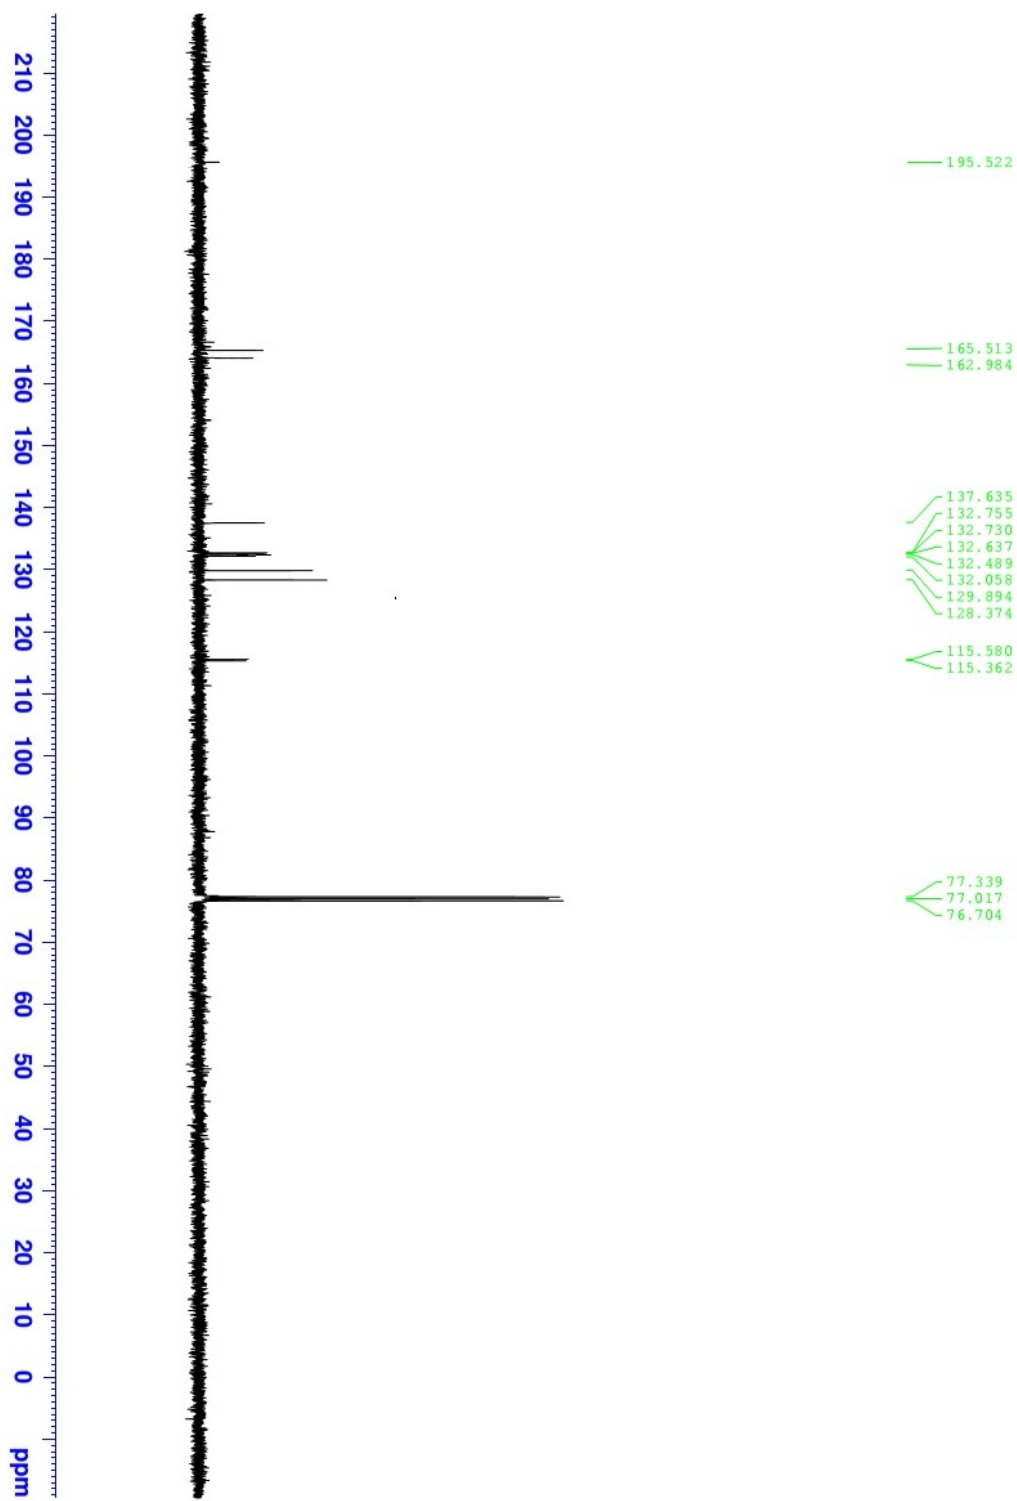

$^{13}\text{C}$  NMR of Compound 2d

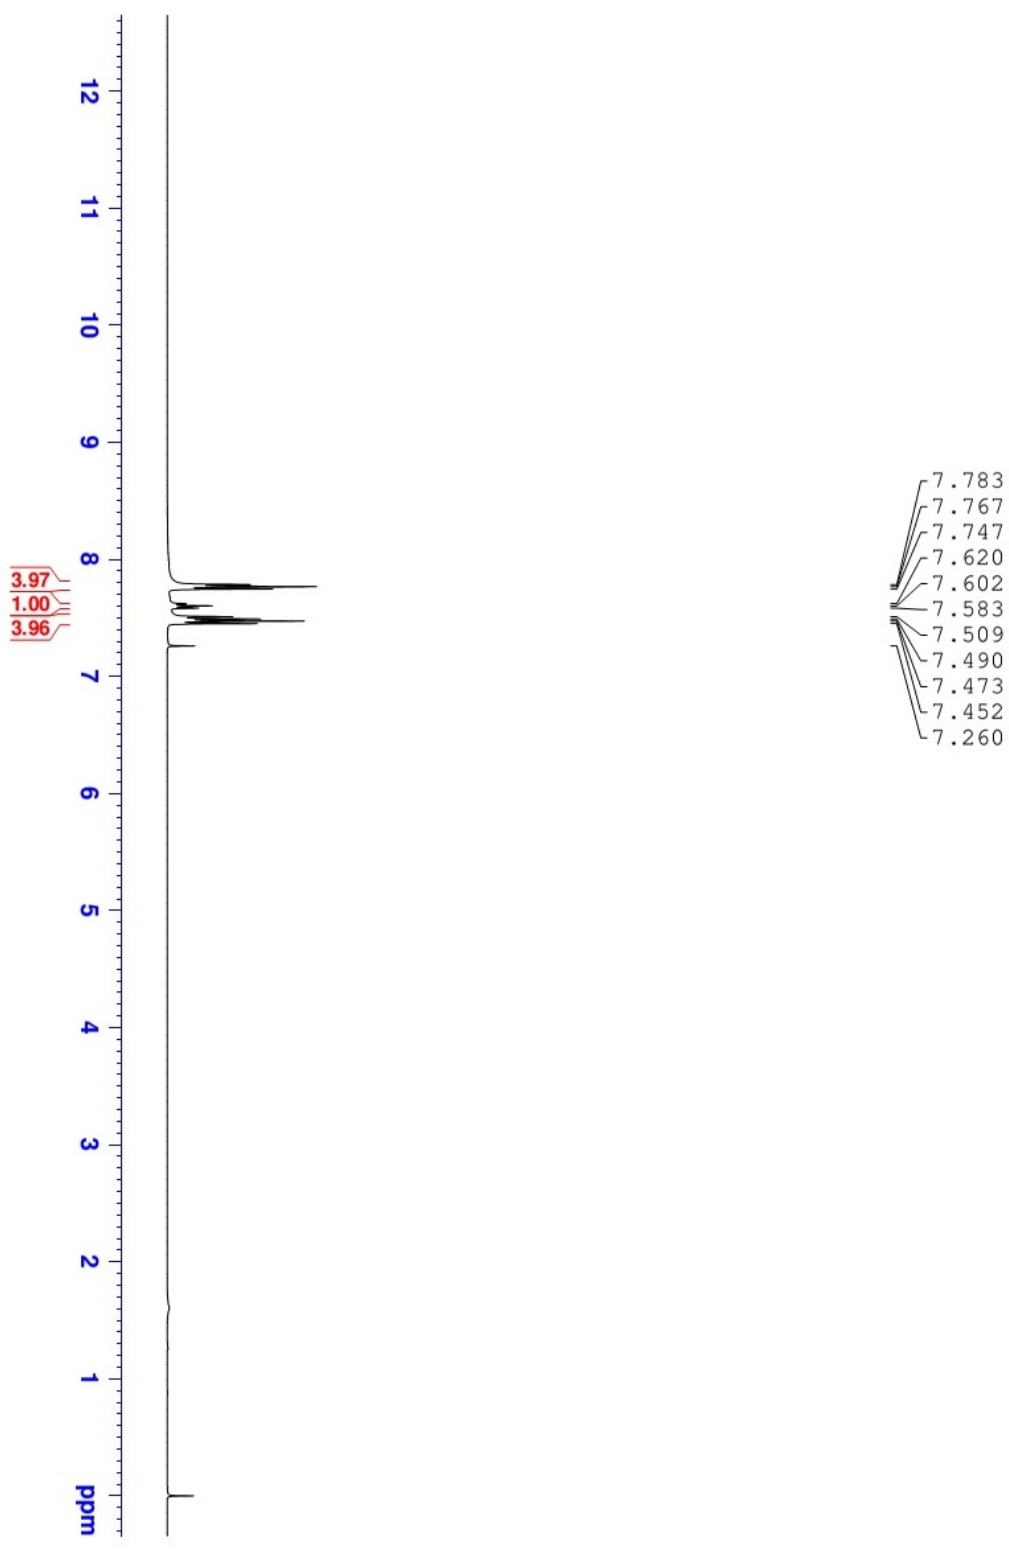

<sup>1</sup>H NMR of Compound 2e

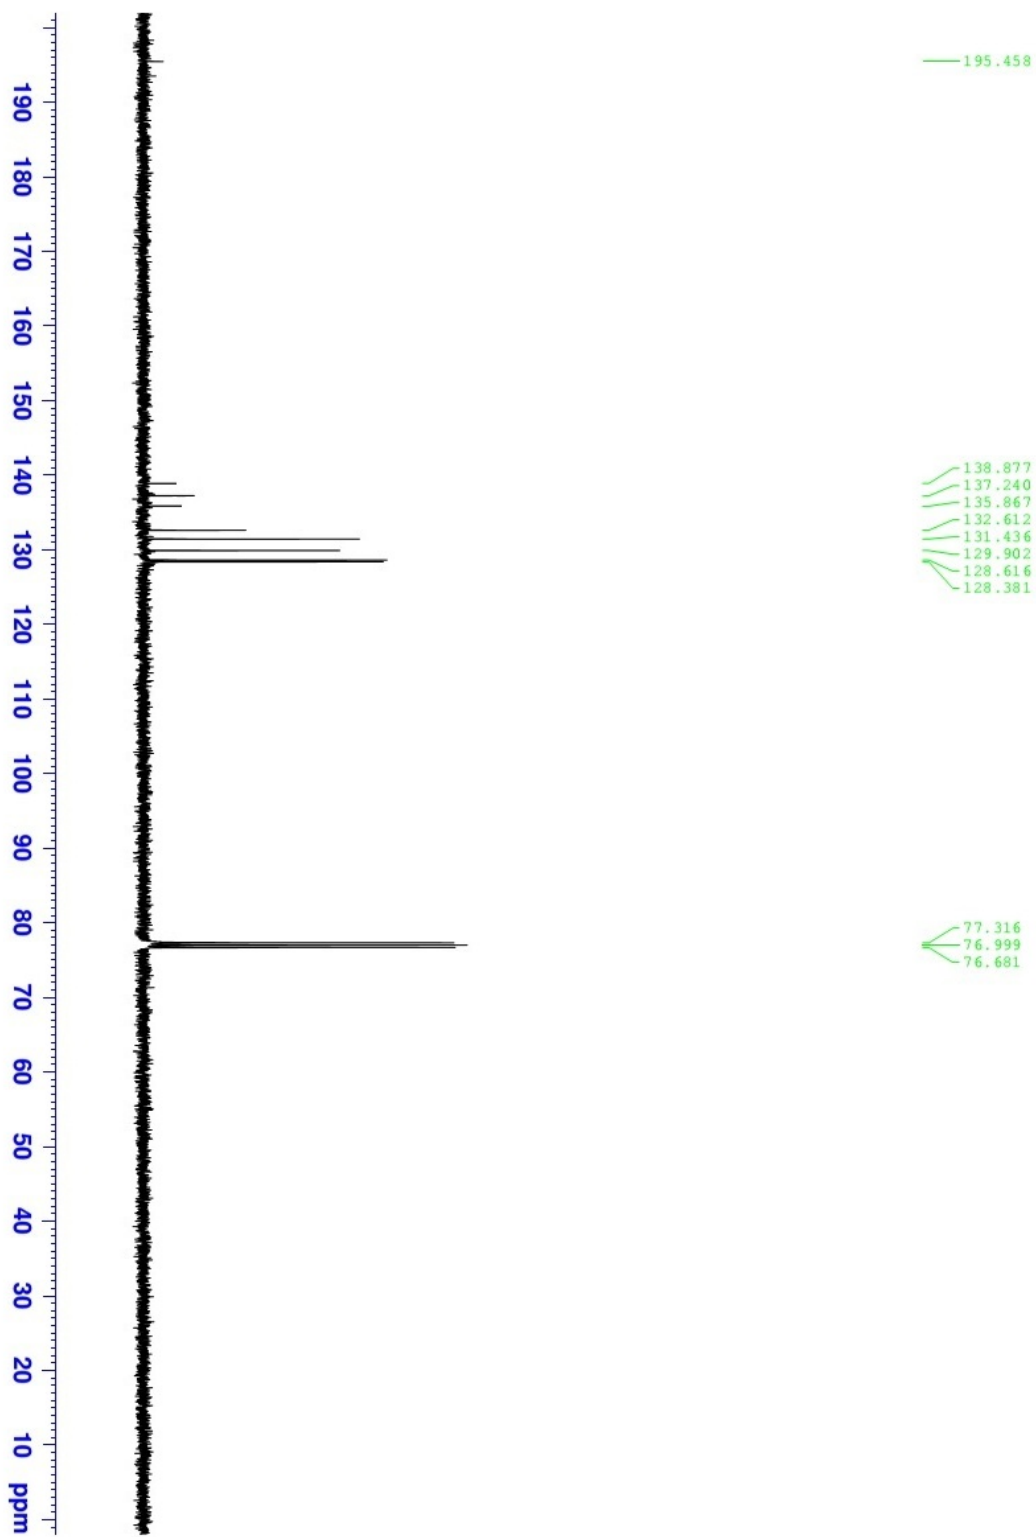

$^{13}\text{C}$  NMR of Compound 2e



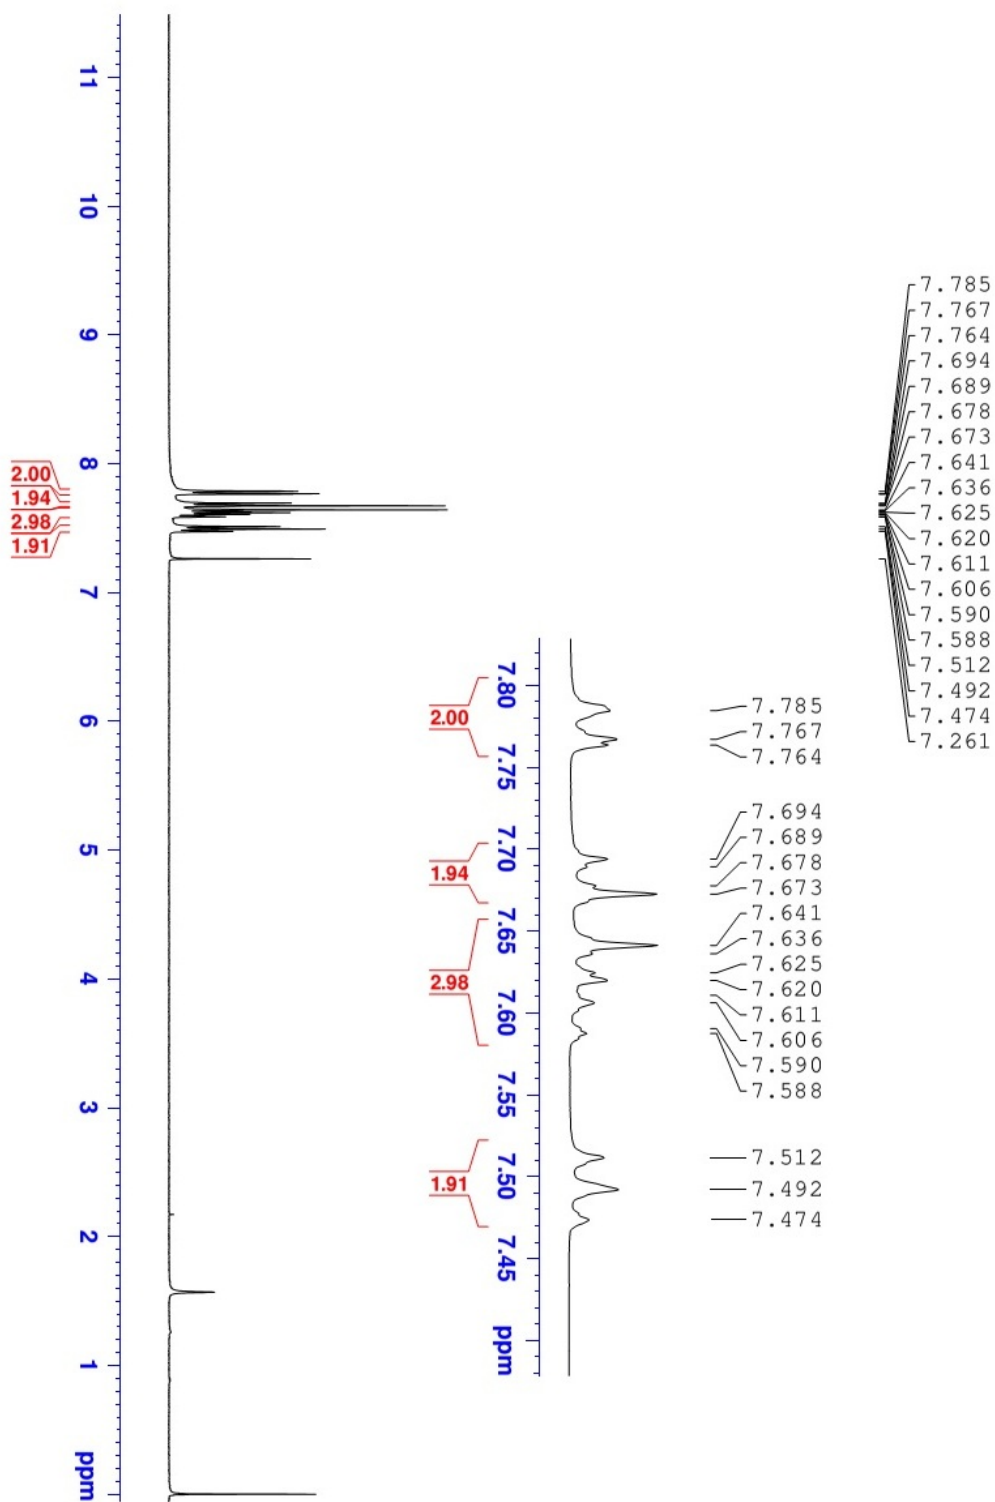

$^1\text{H}$  NMR of Compound 2f

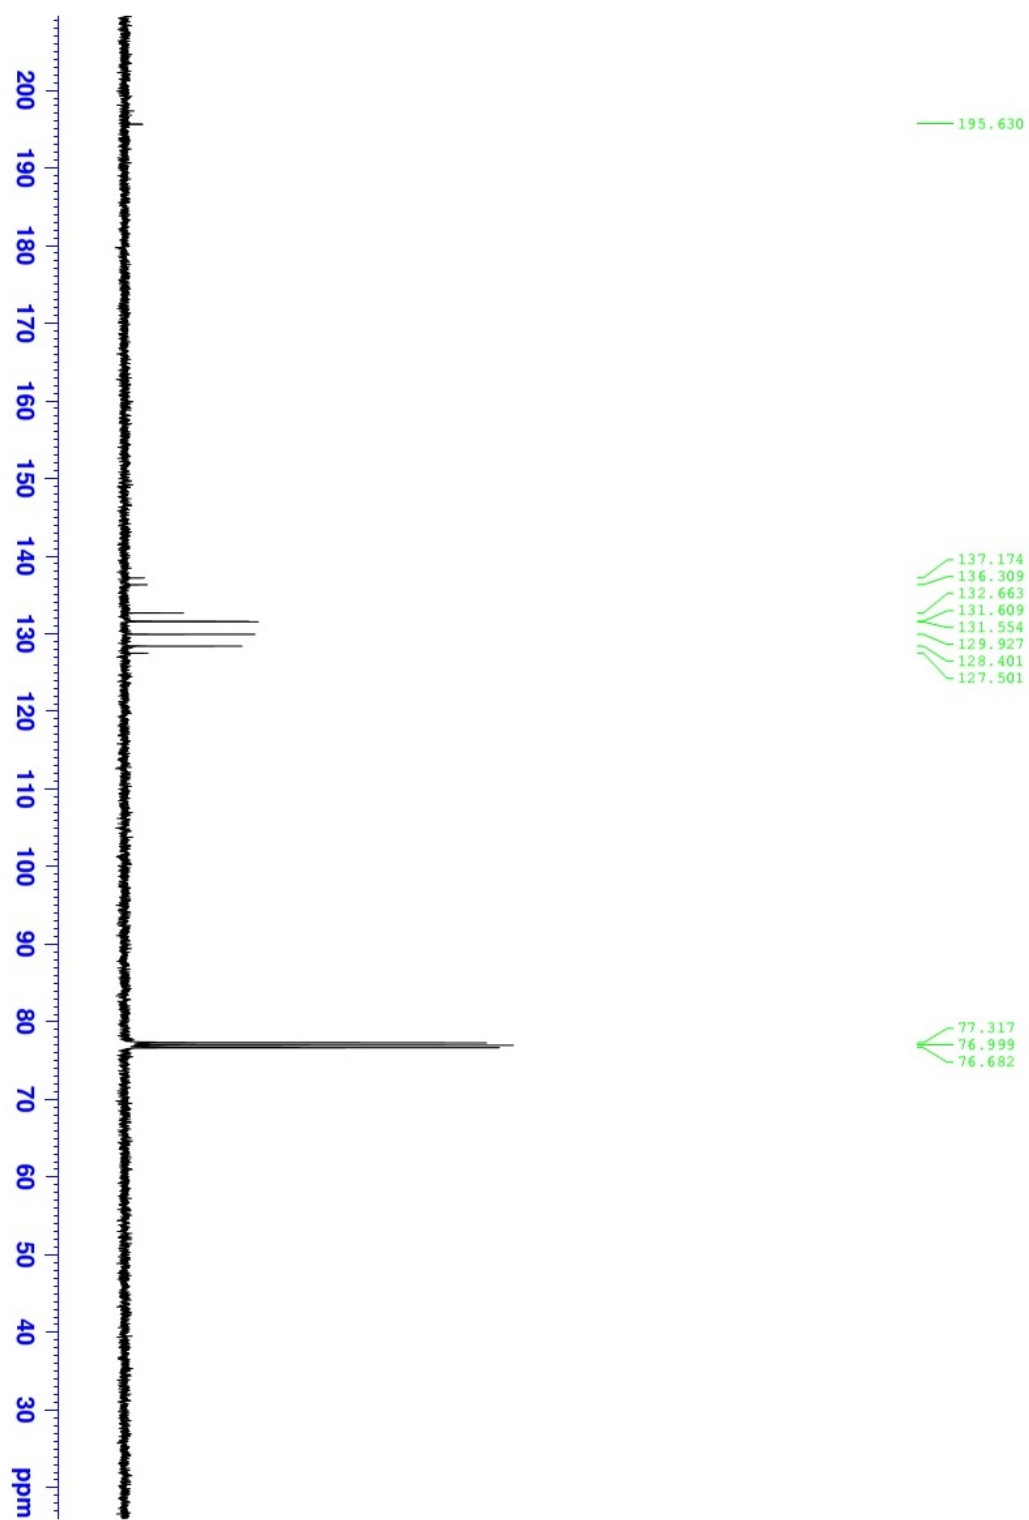

$^{13}\text{C}$  NMR of Compound 2f

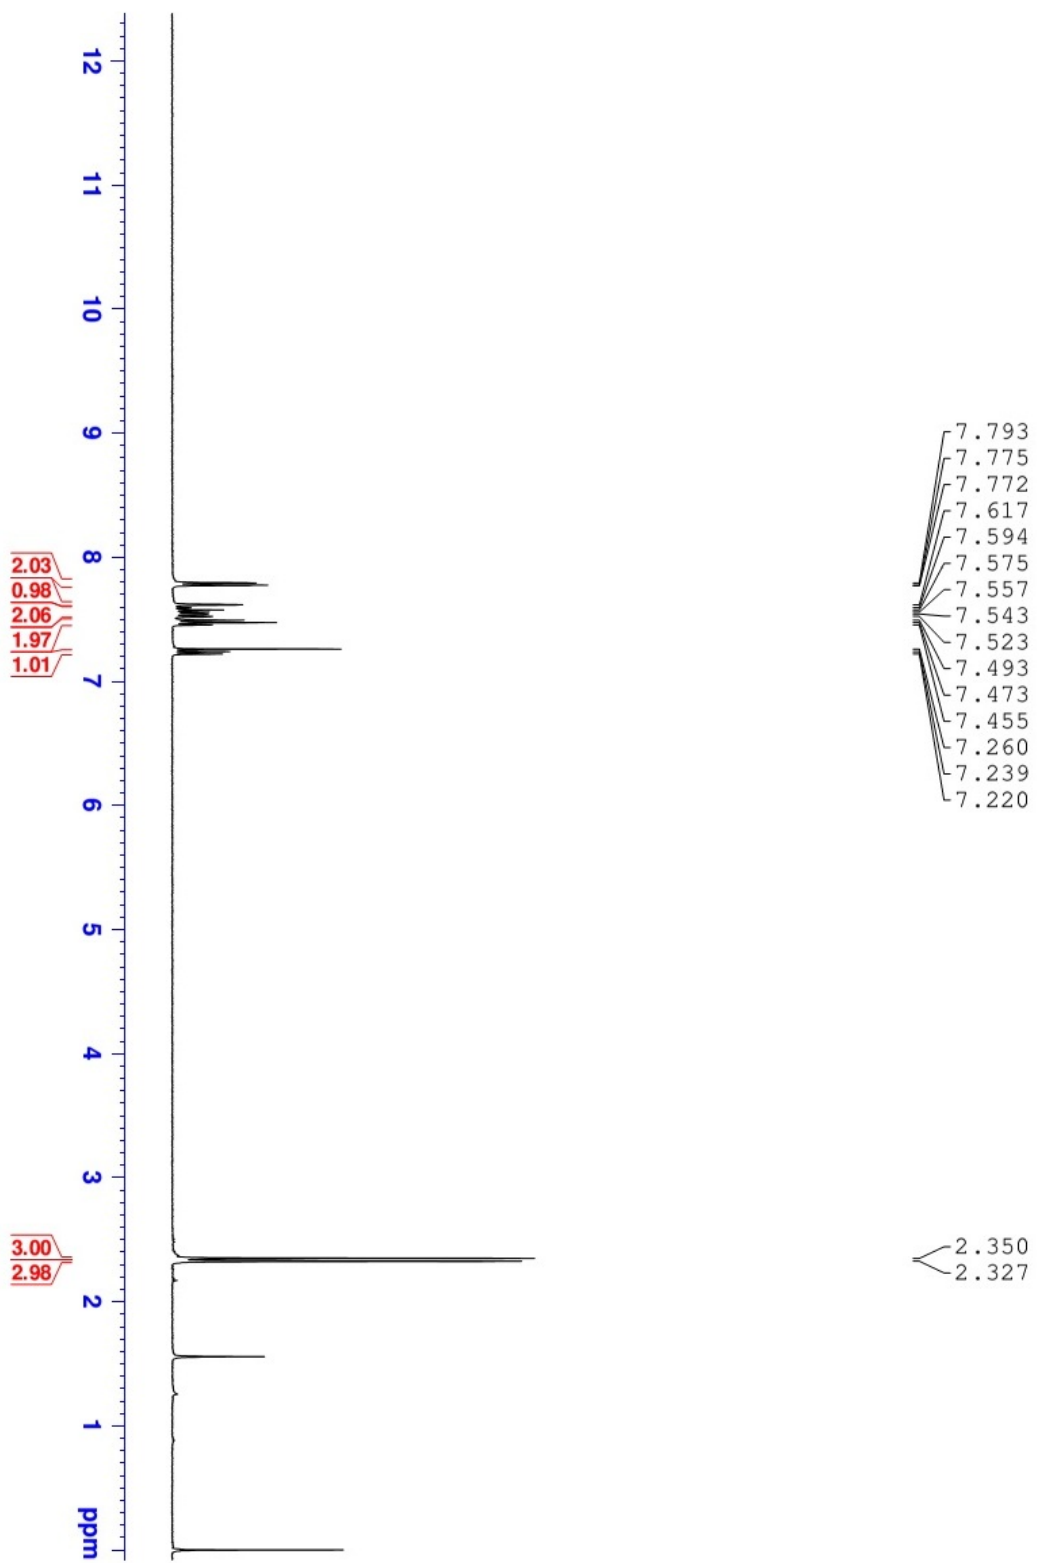

<sup>1</sup>H NMR of Compound 2g

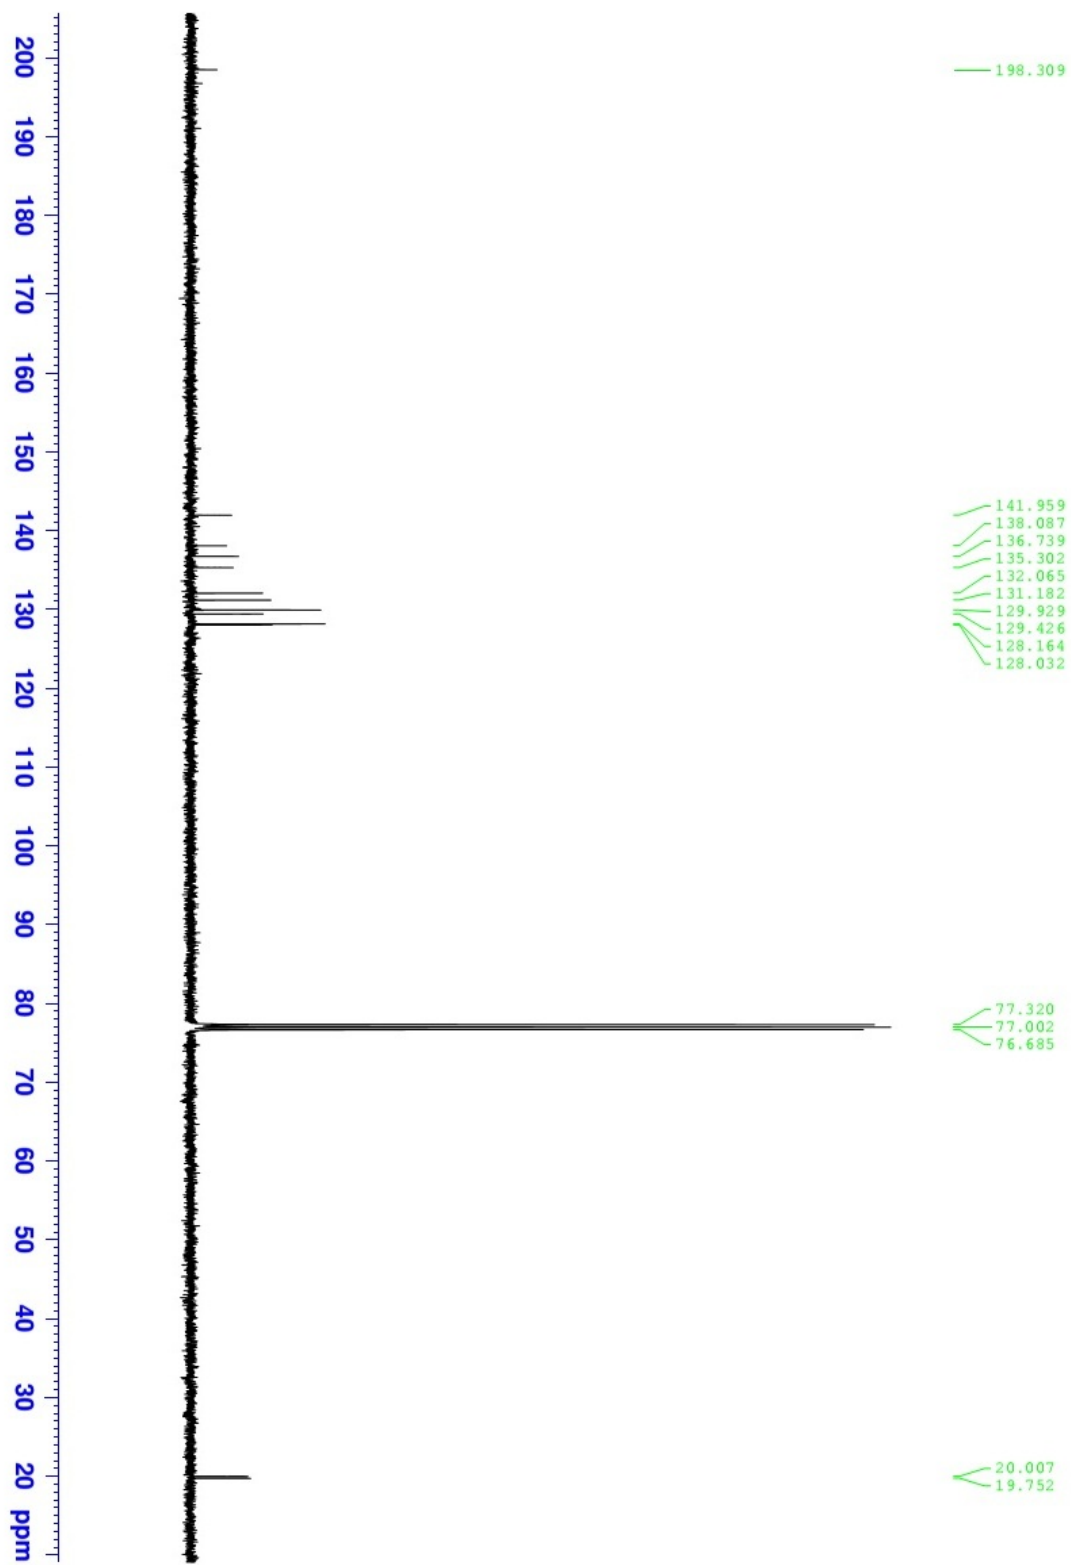

<sup>13</sup>C NMR of Compound 2g

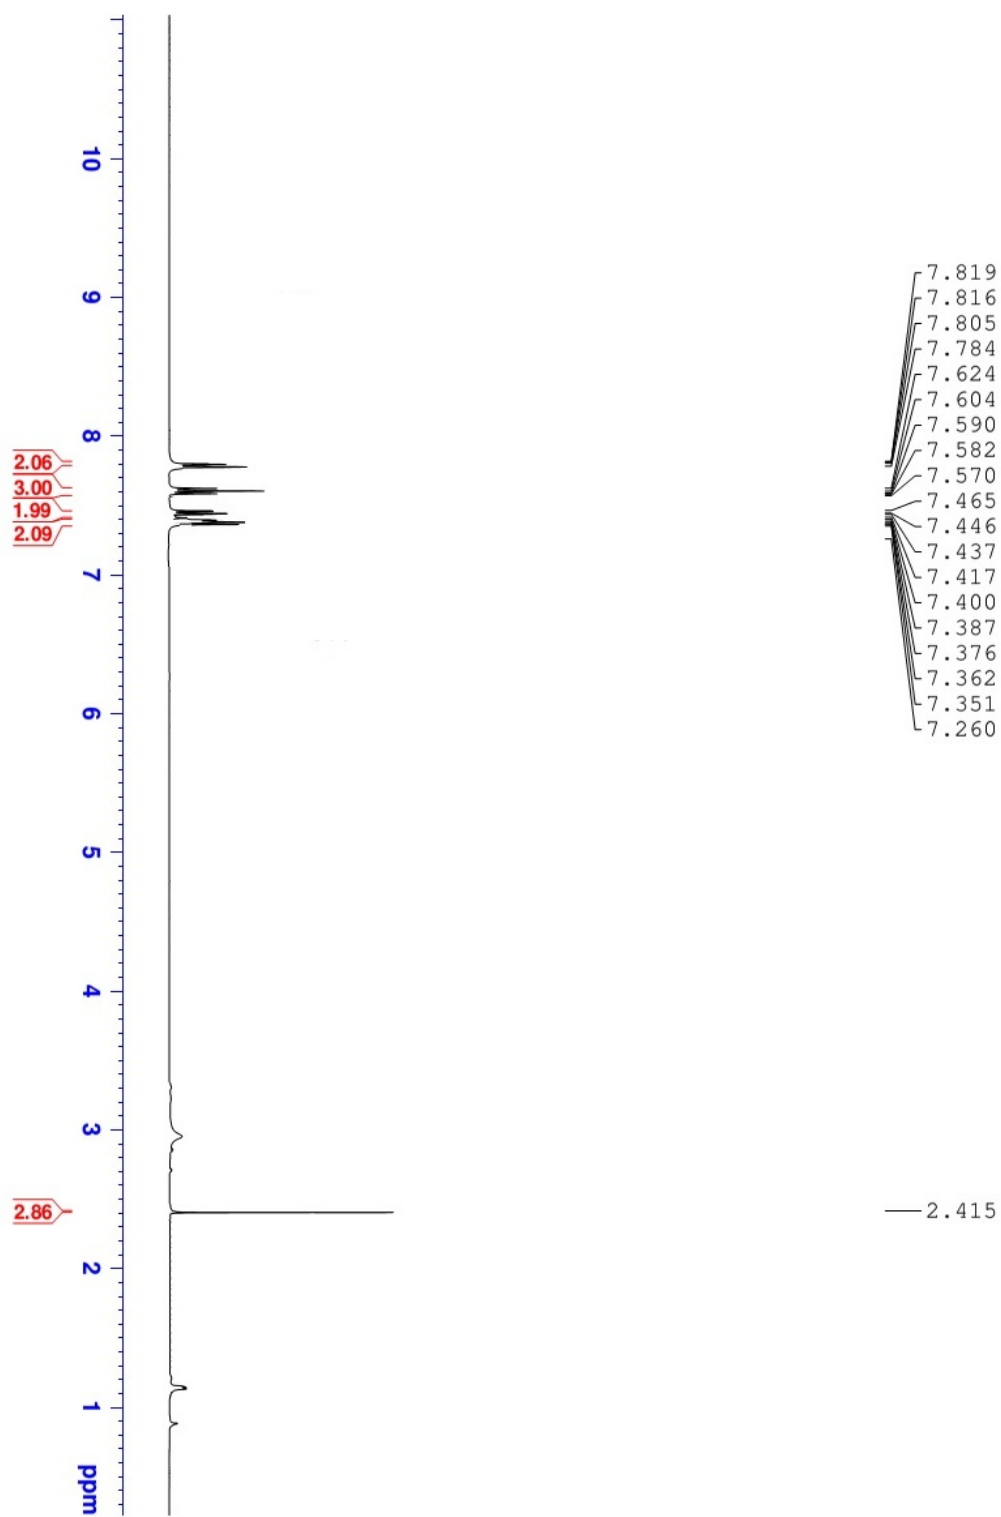

$^1\text{H}$  NMR of Compound 2h

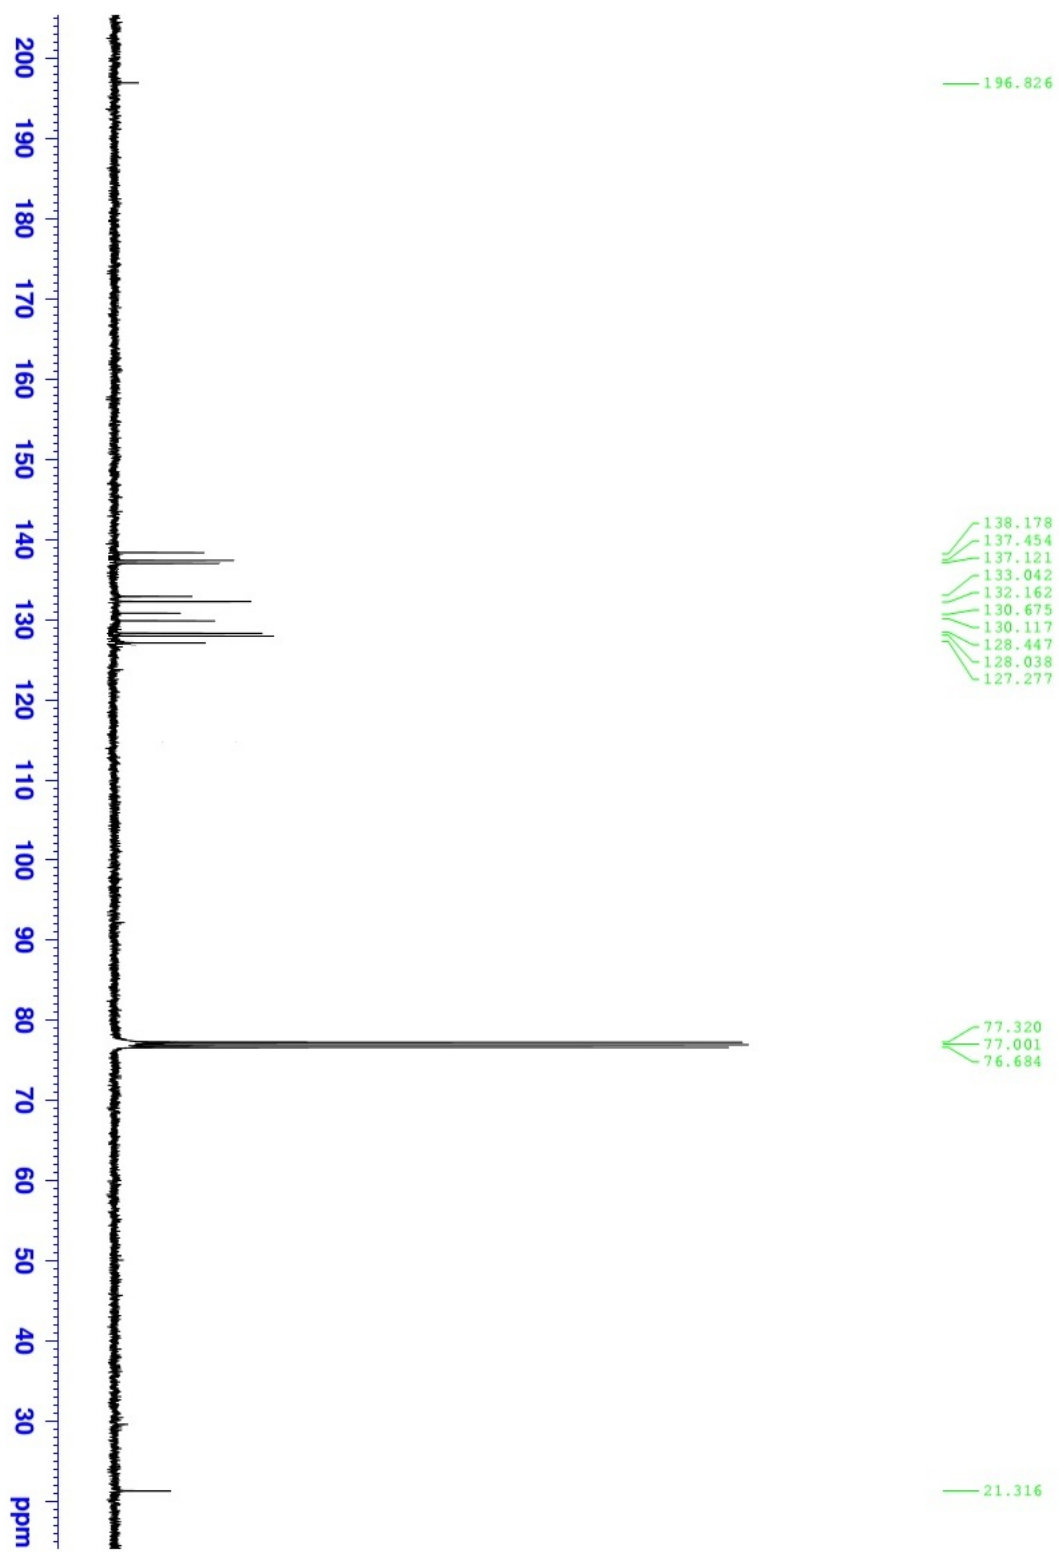

<sup>13</sup>C NMR of Compound 2h

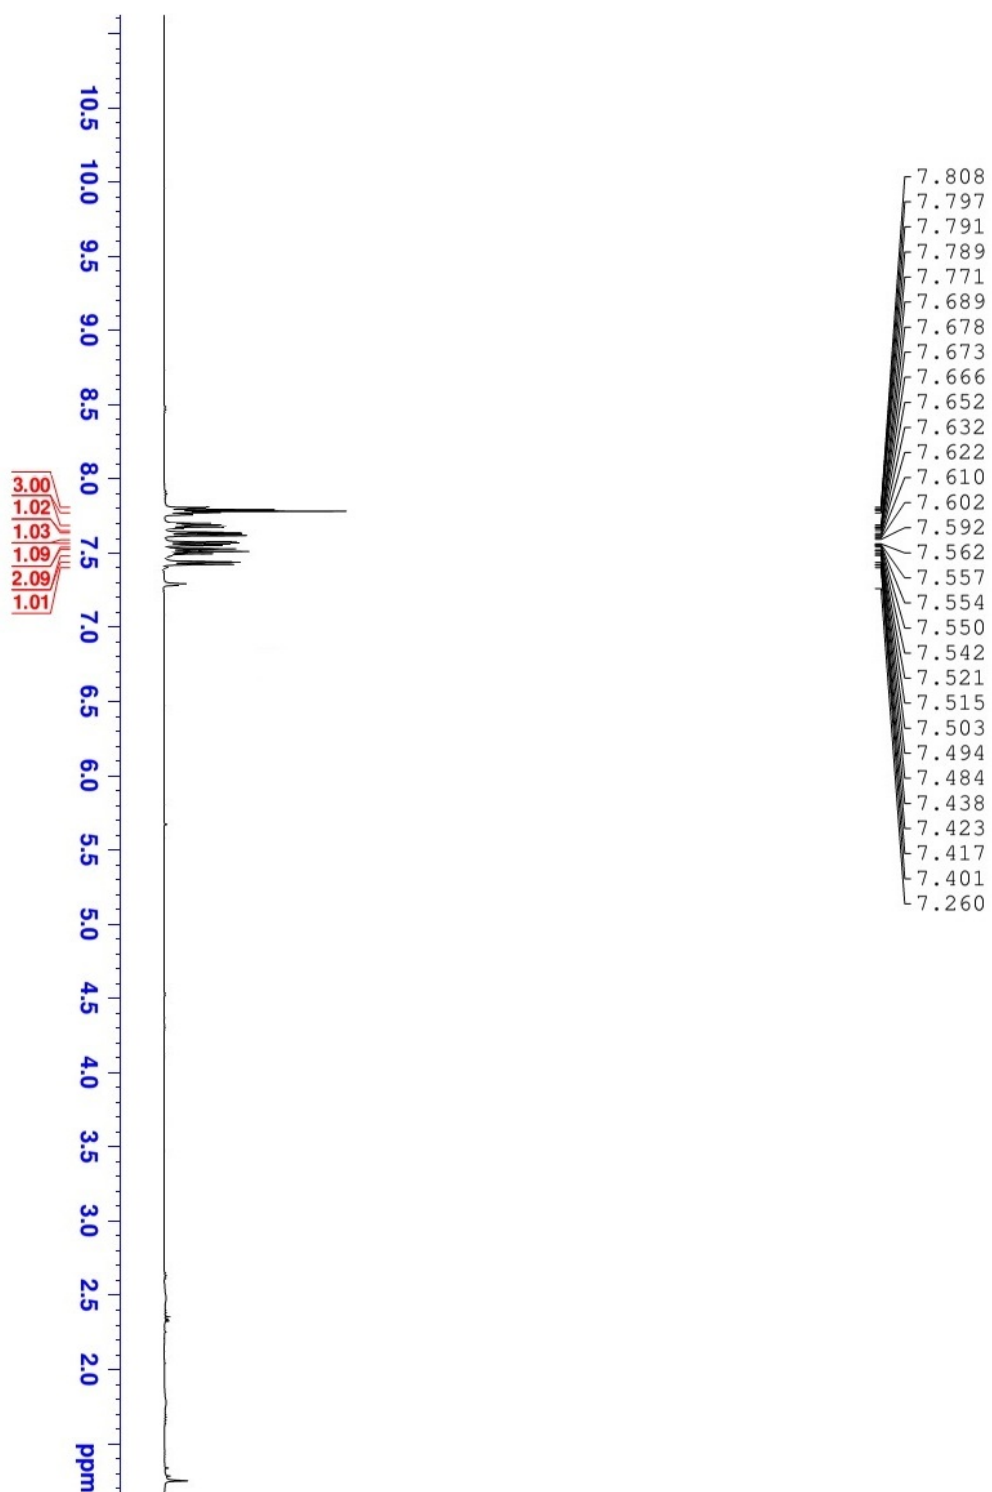

$^1\text{H}$  NMR of Compound 2i

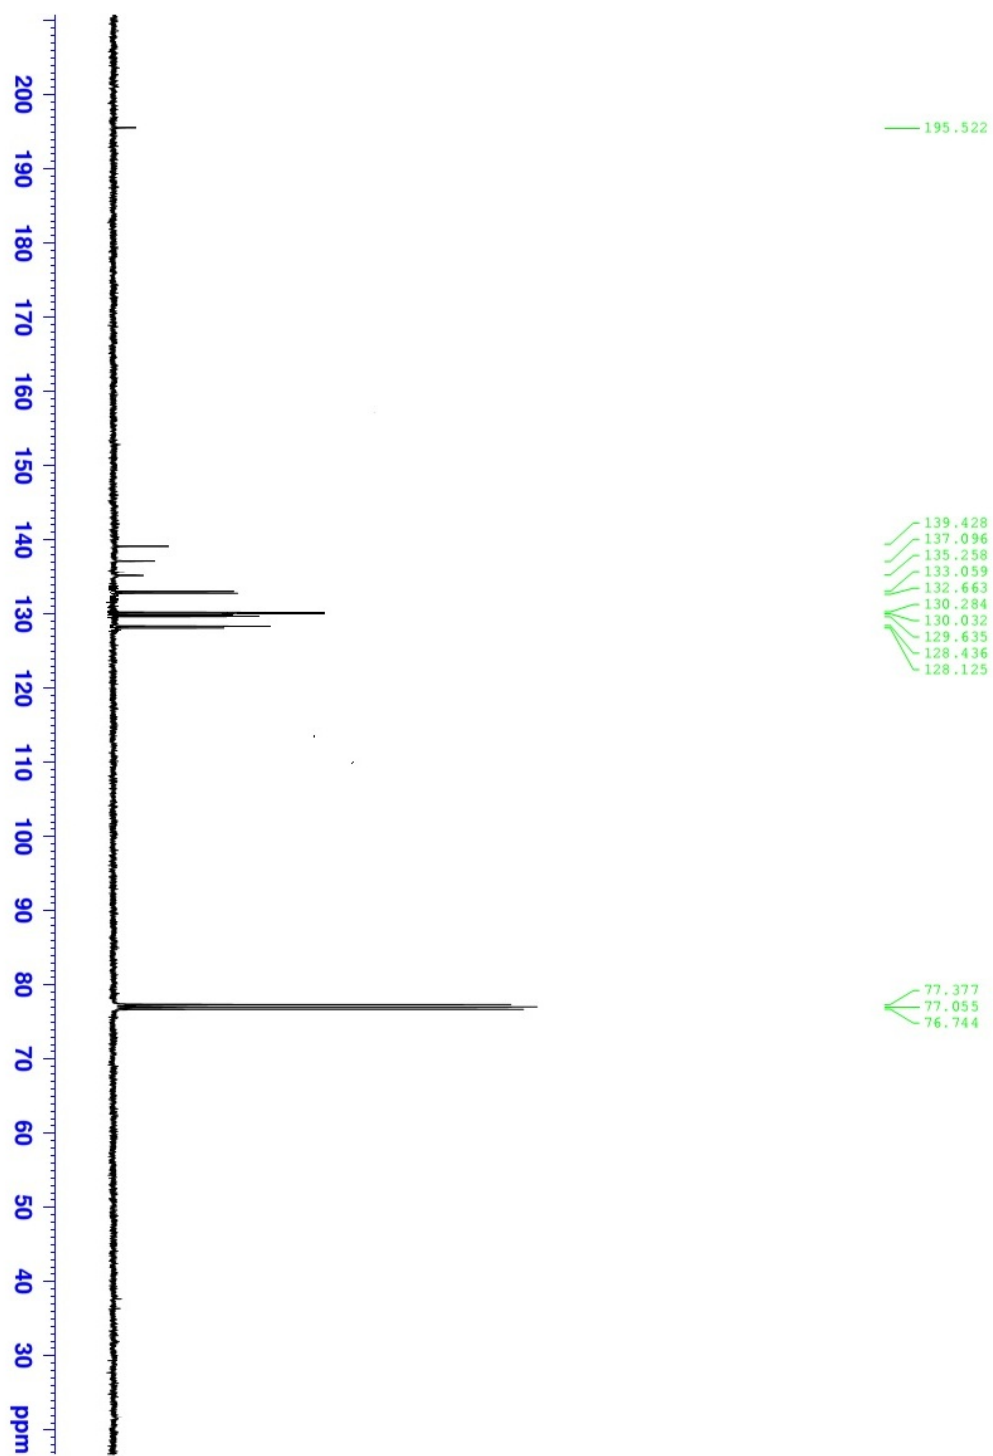

<sup>13</sup>C NMR of Compound 2i



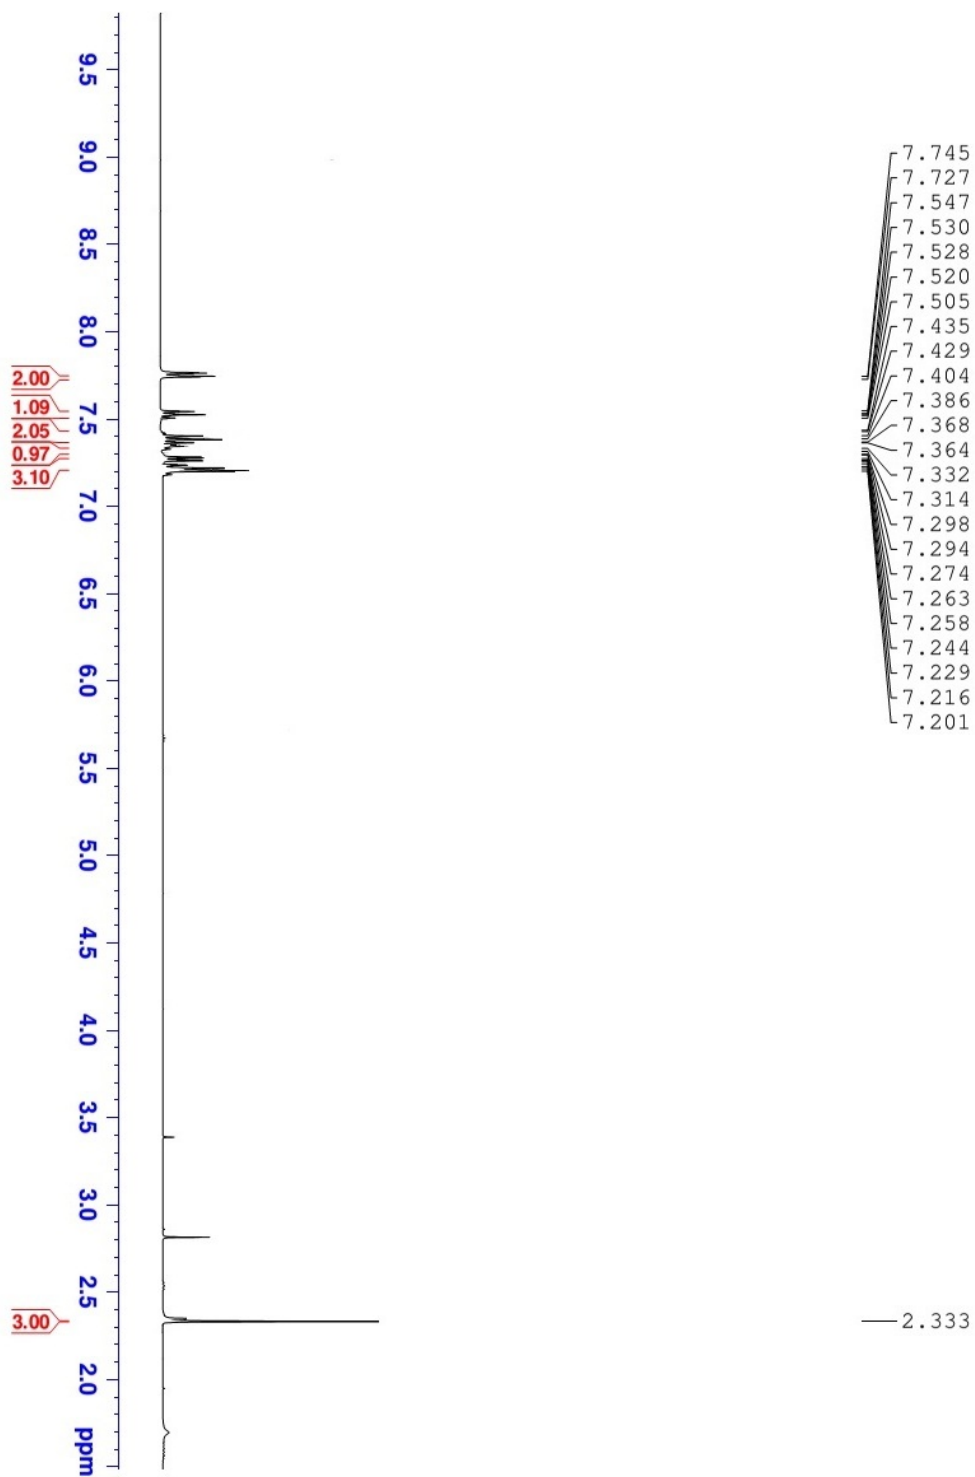

<sup>1</sup>H NMR of Compound 2j

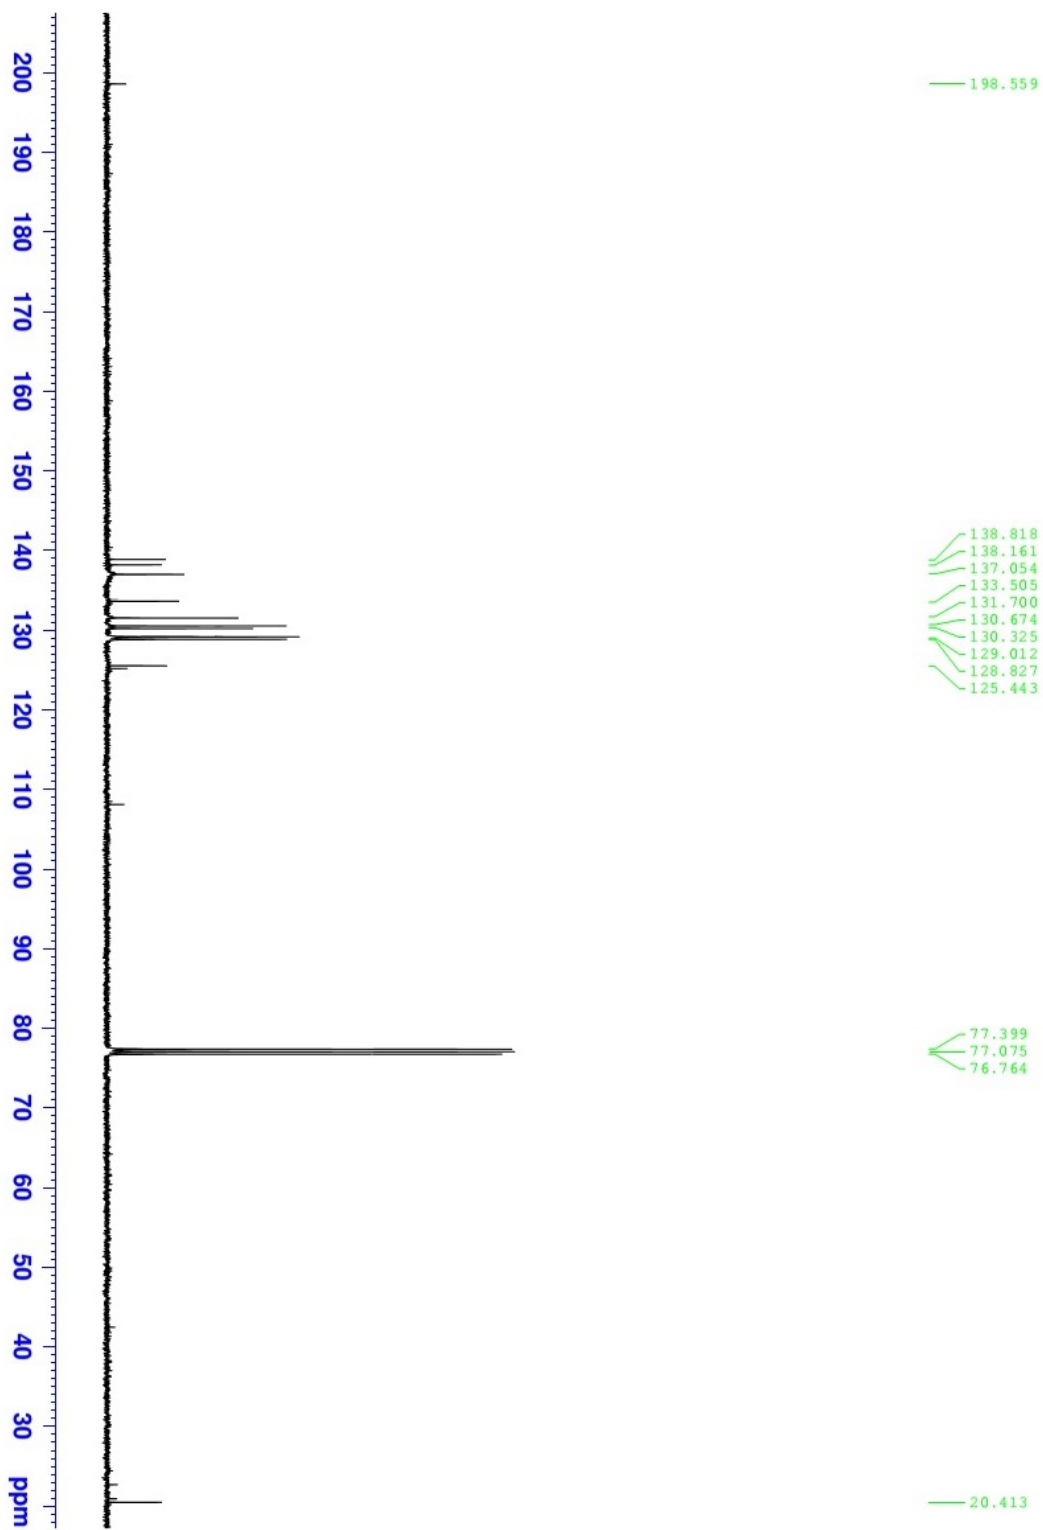

<sup>13</sup>C NMR of Compound 2j

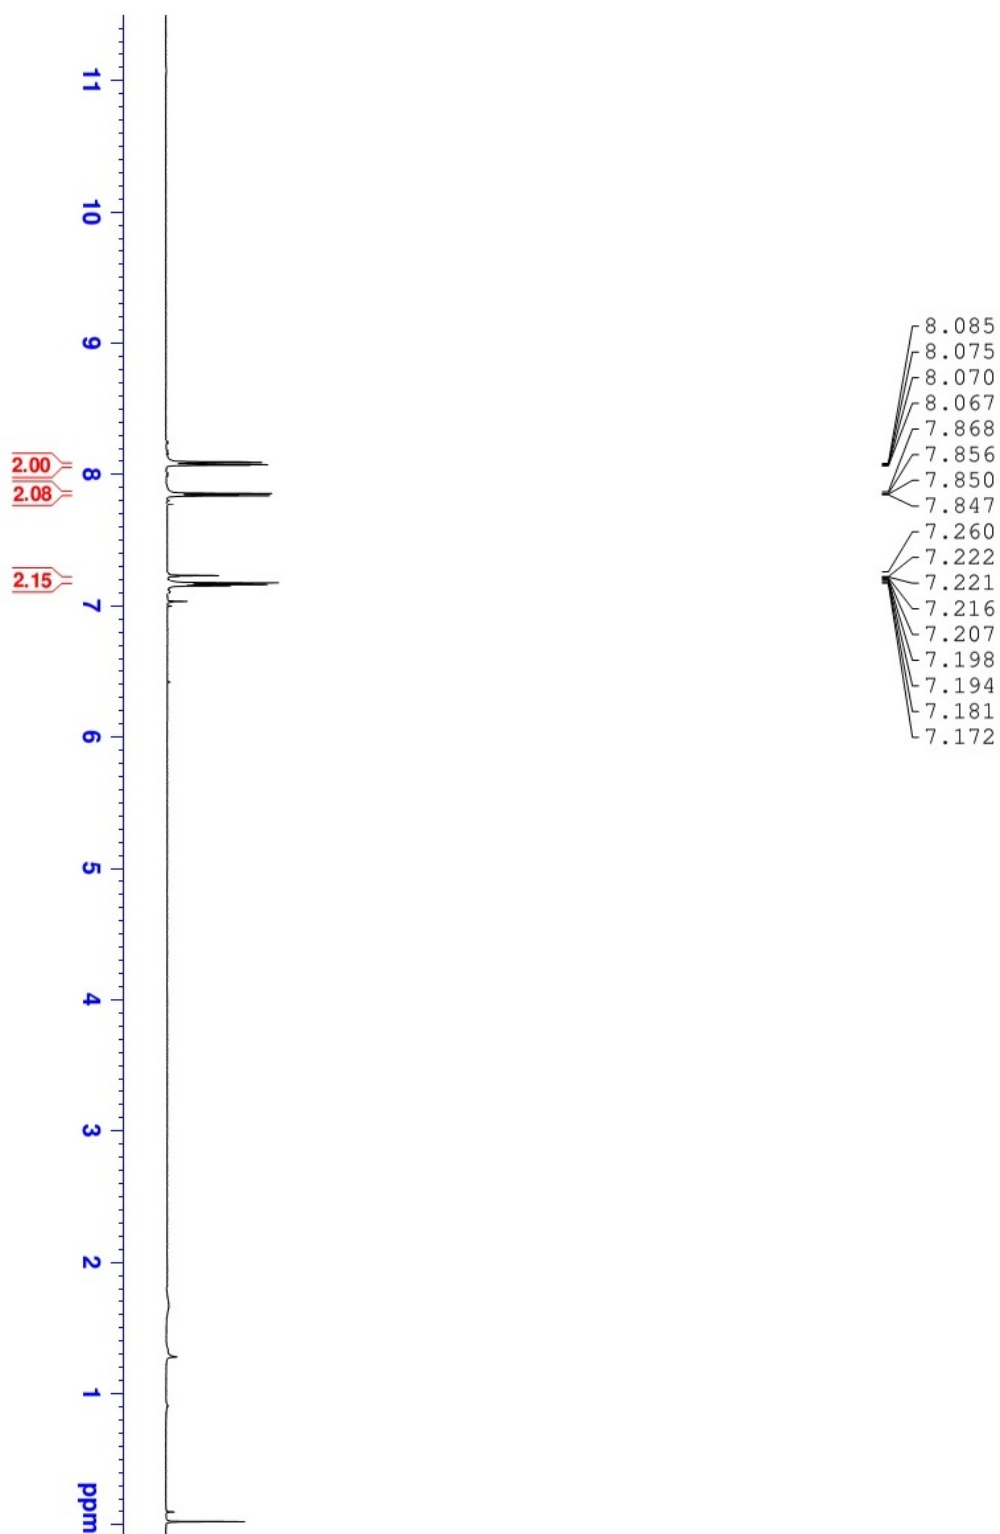

<sup>1</sup>H NMR of Compound 2k

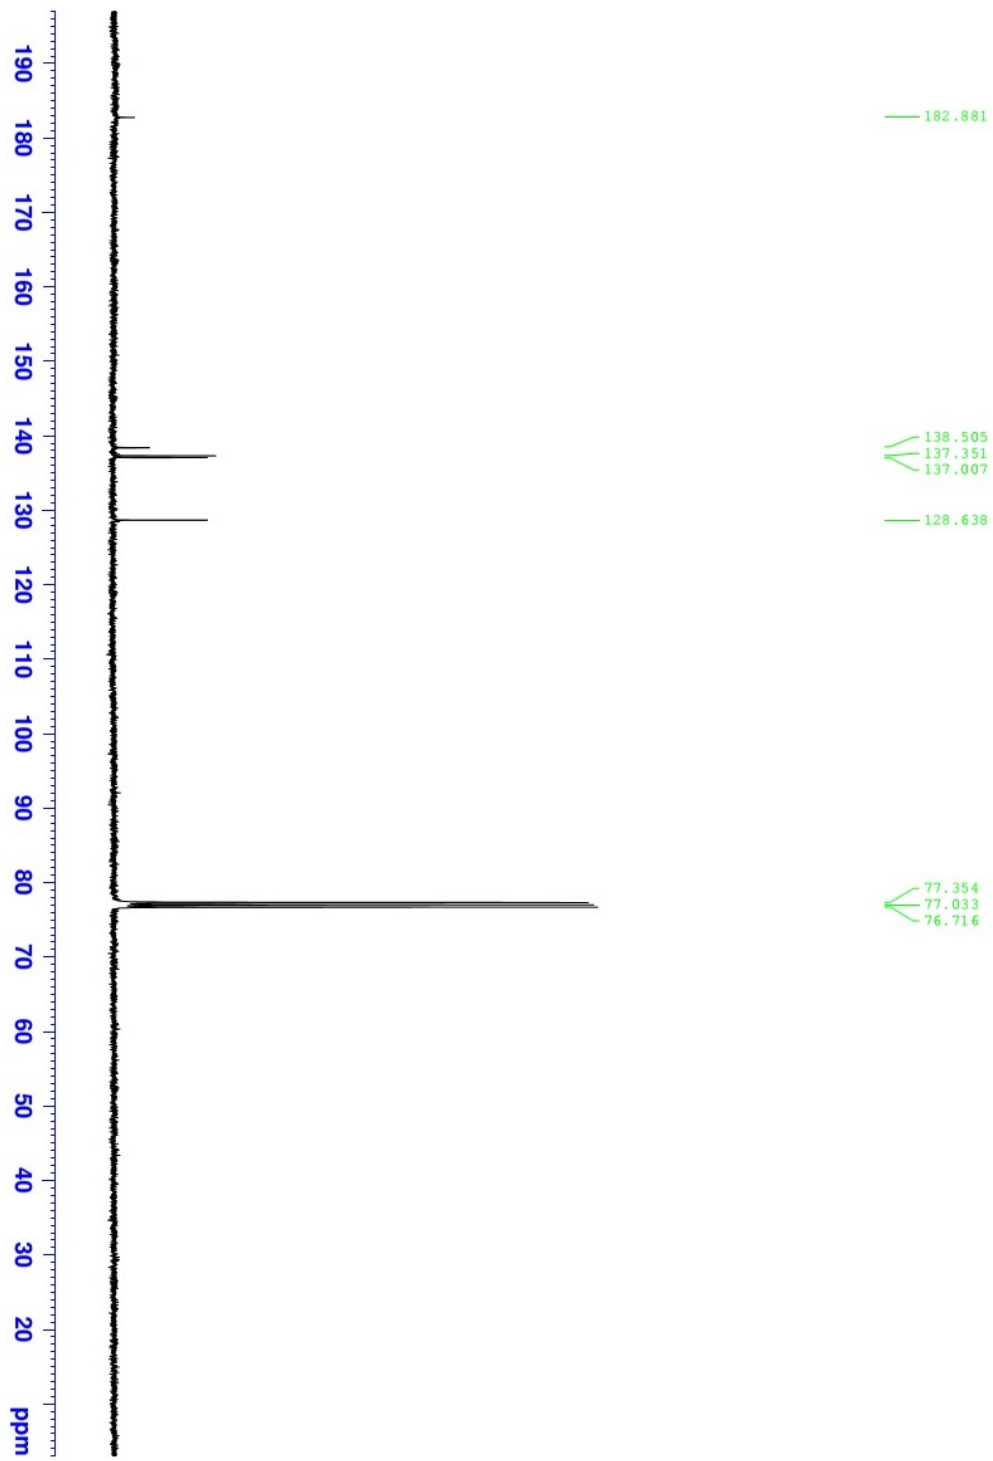

$^{13}\text{C}$  NMR of Compound 2k

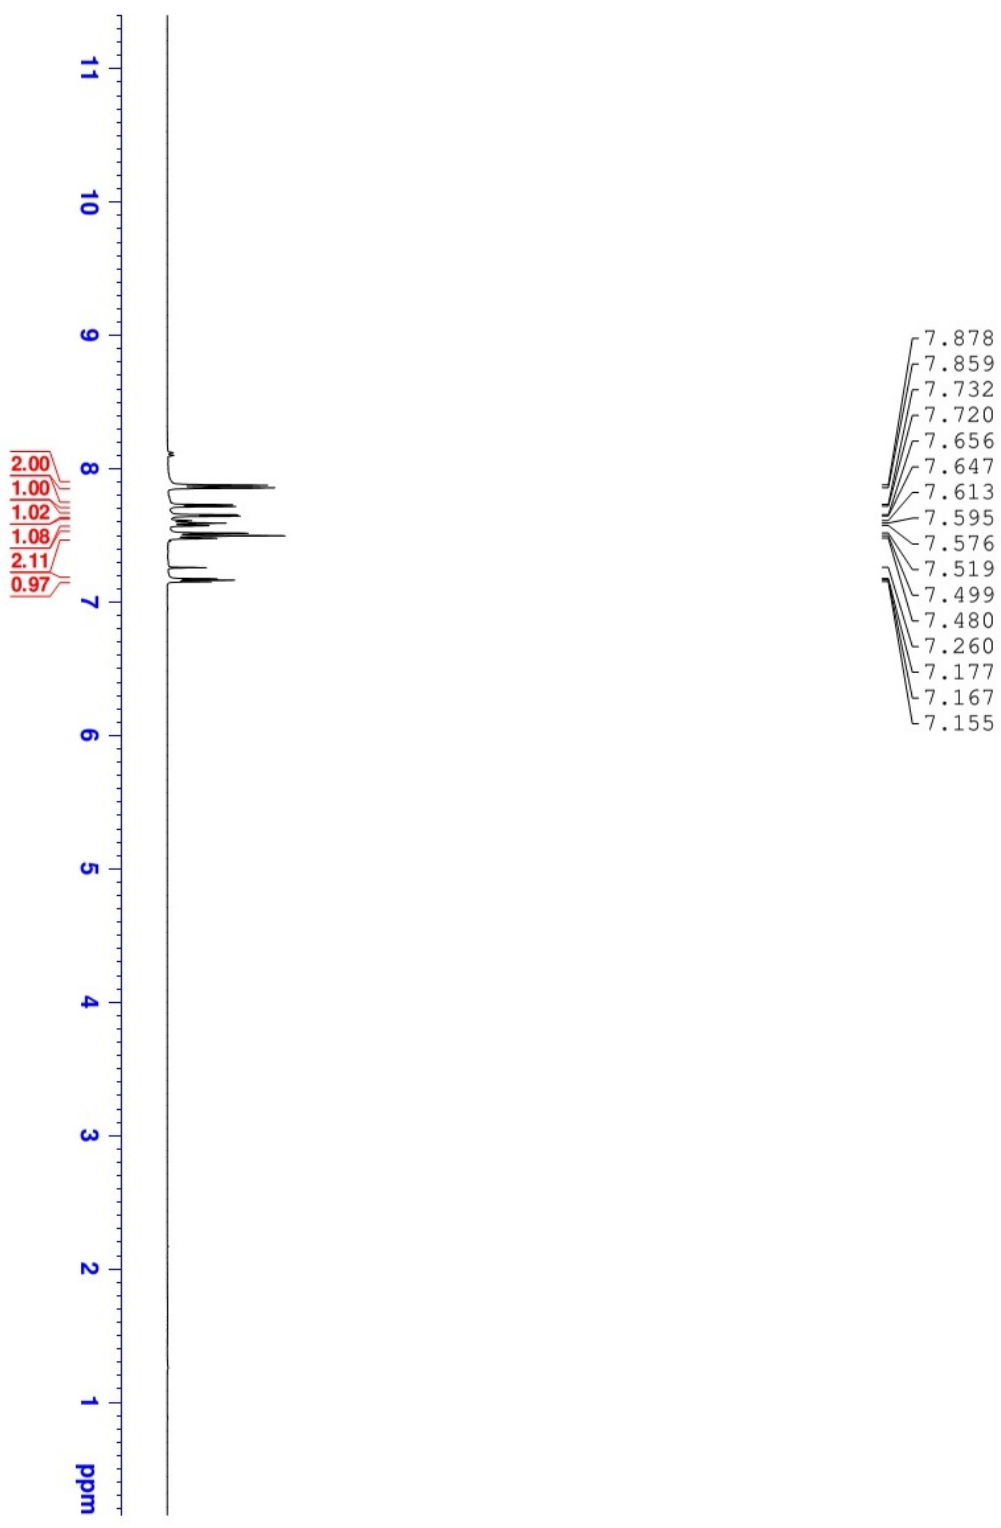

<sup>1</sup>H NMR of Compound 21

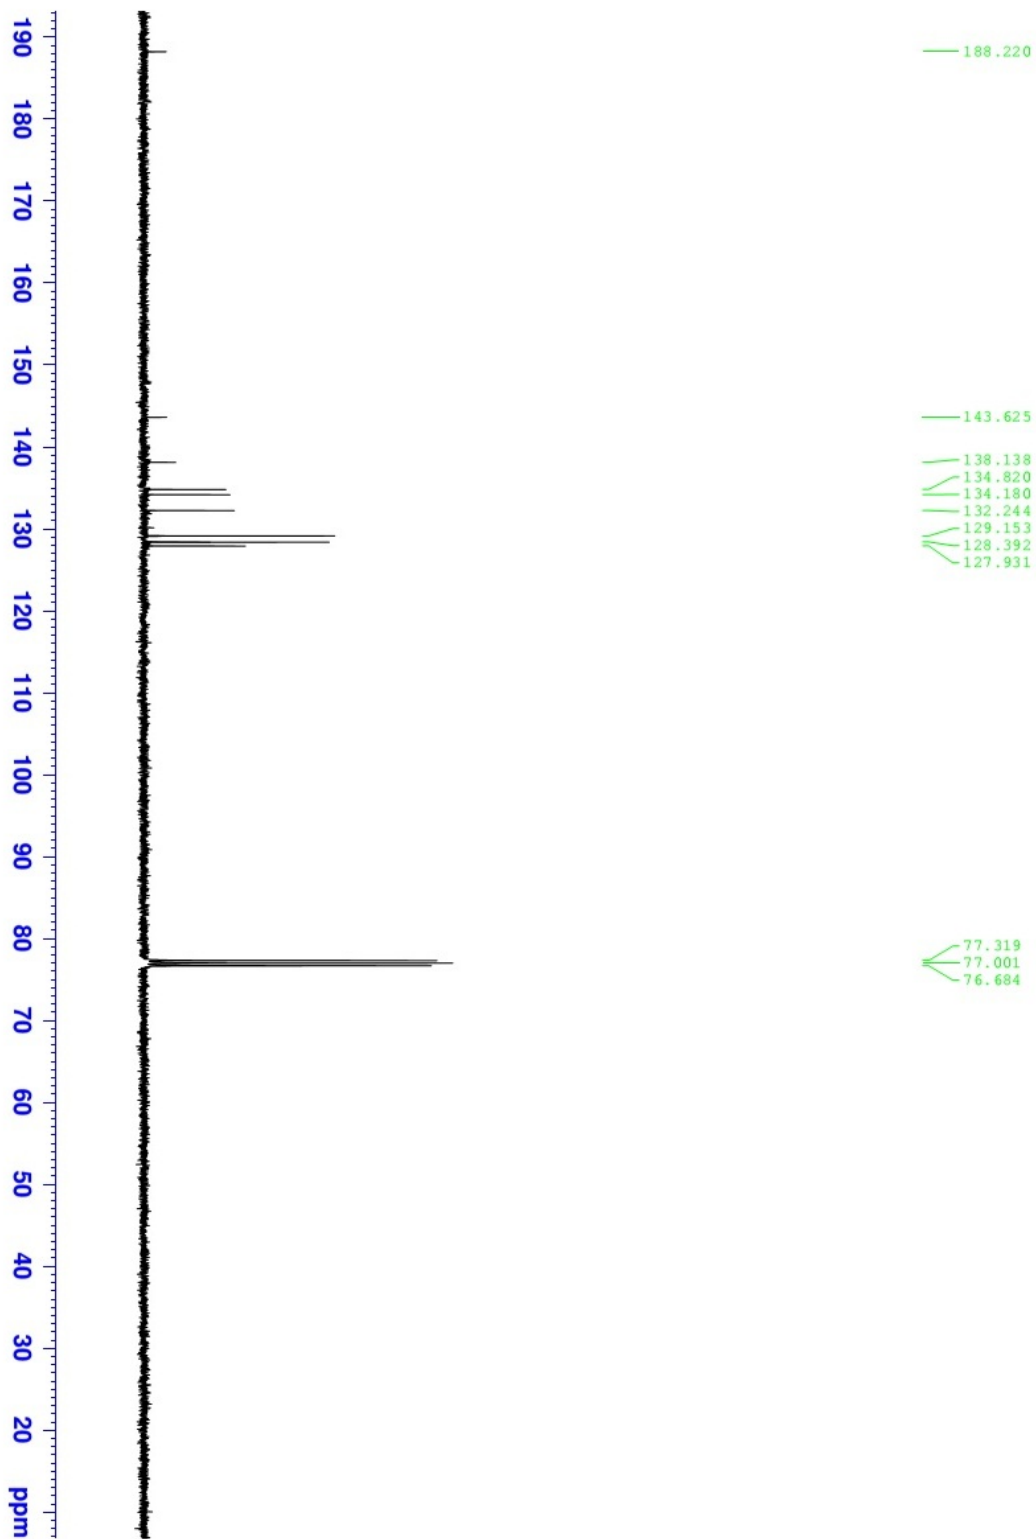

$^{13}\text{C}$  NMR of Compound 21

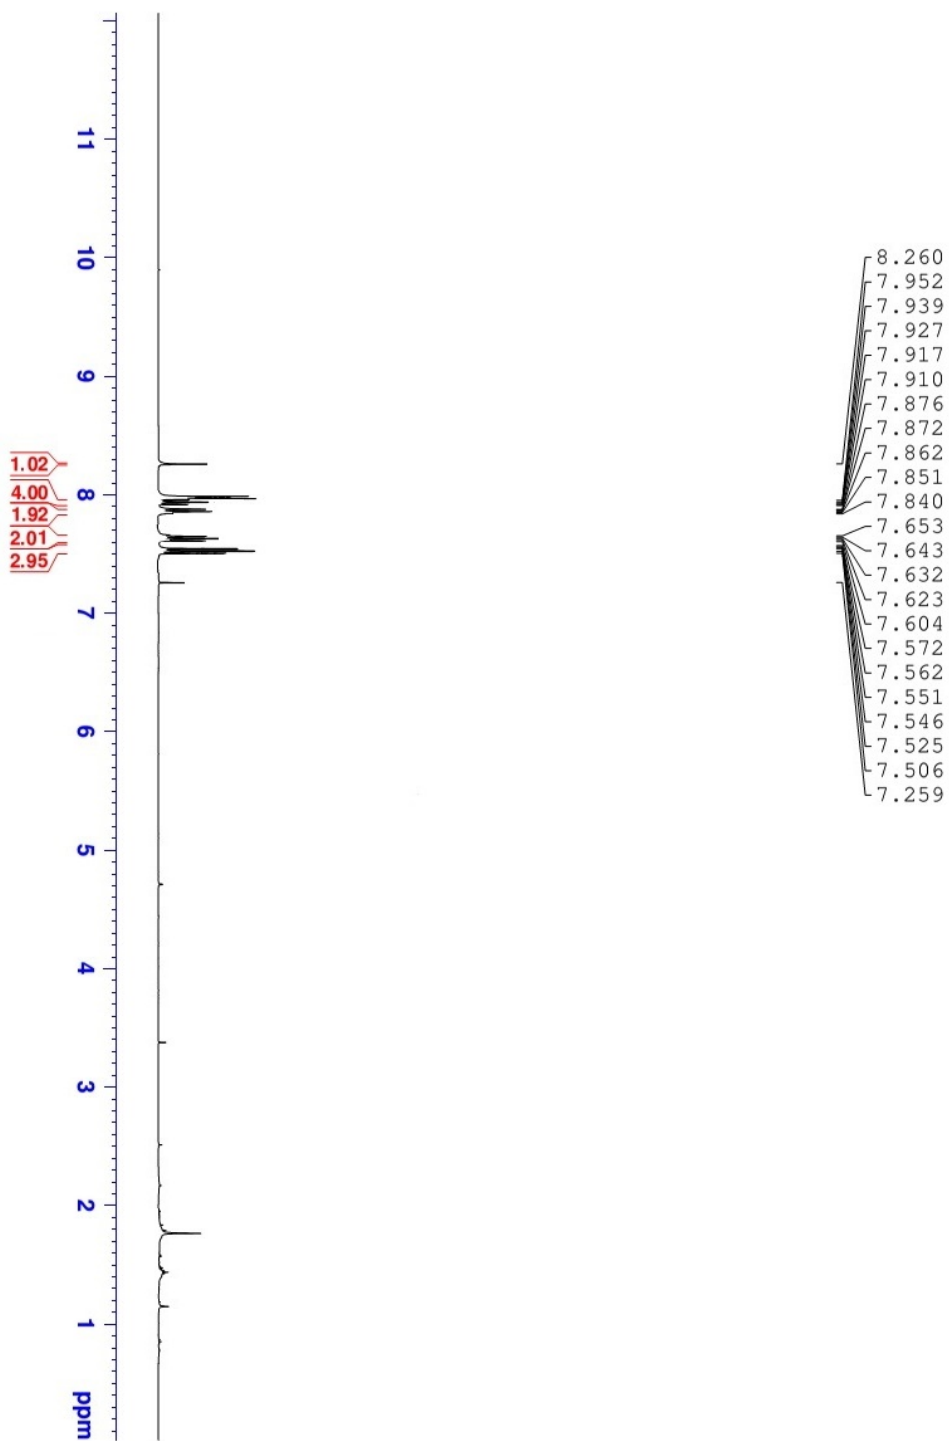

$^1\text{H}$  NMR of Compound 2m

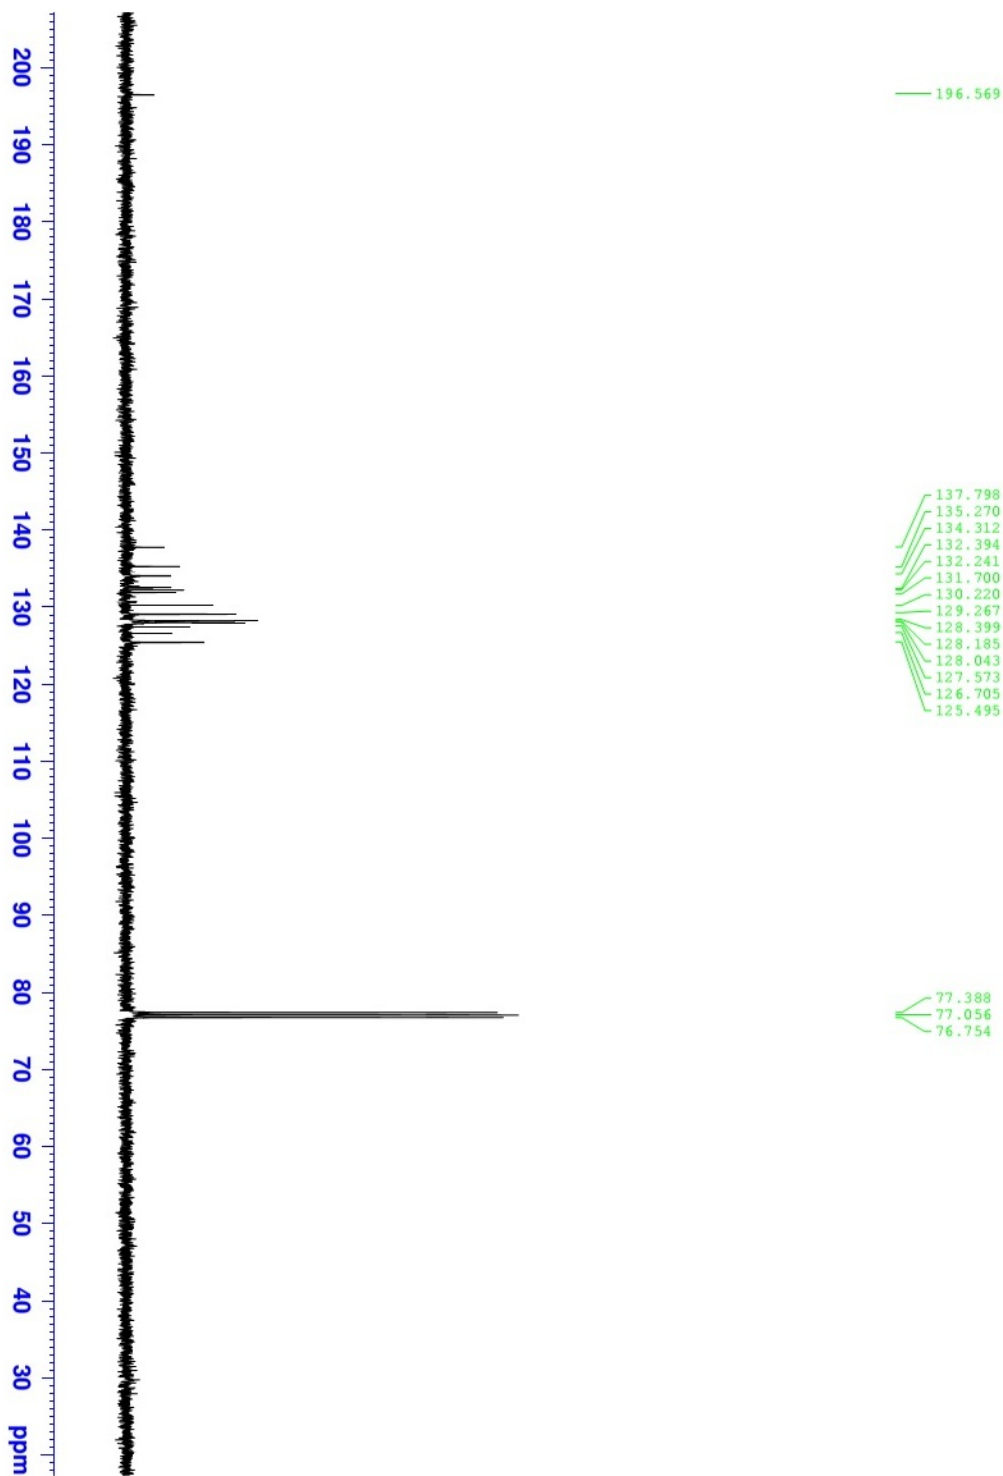

<sup>13</sup>C NMR of Compound 2m



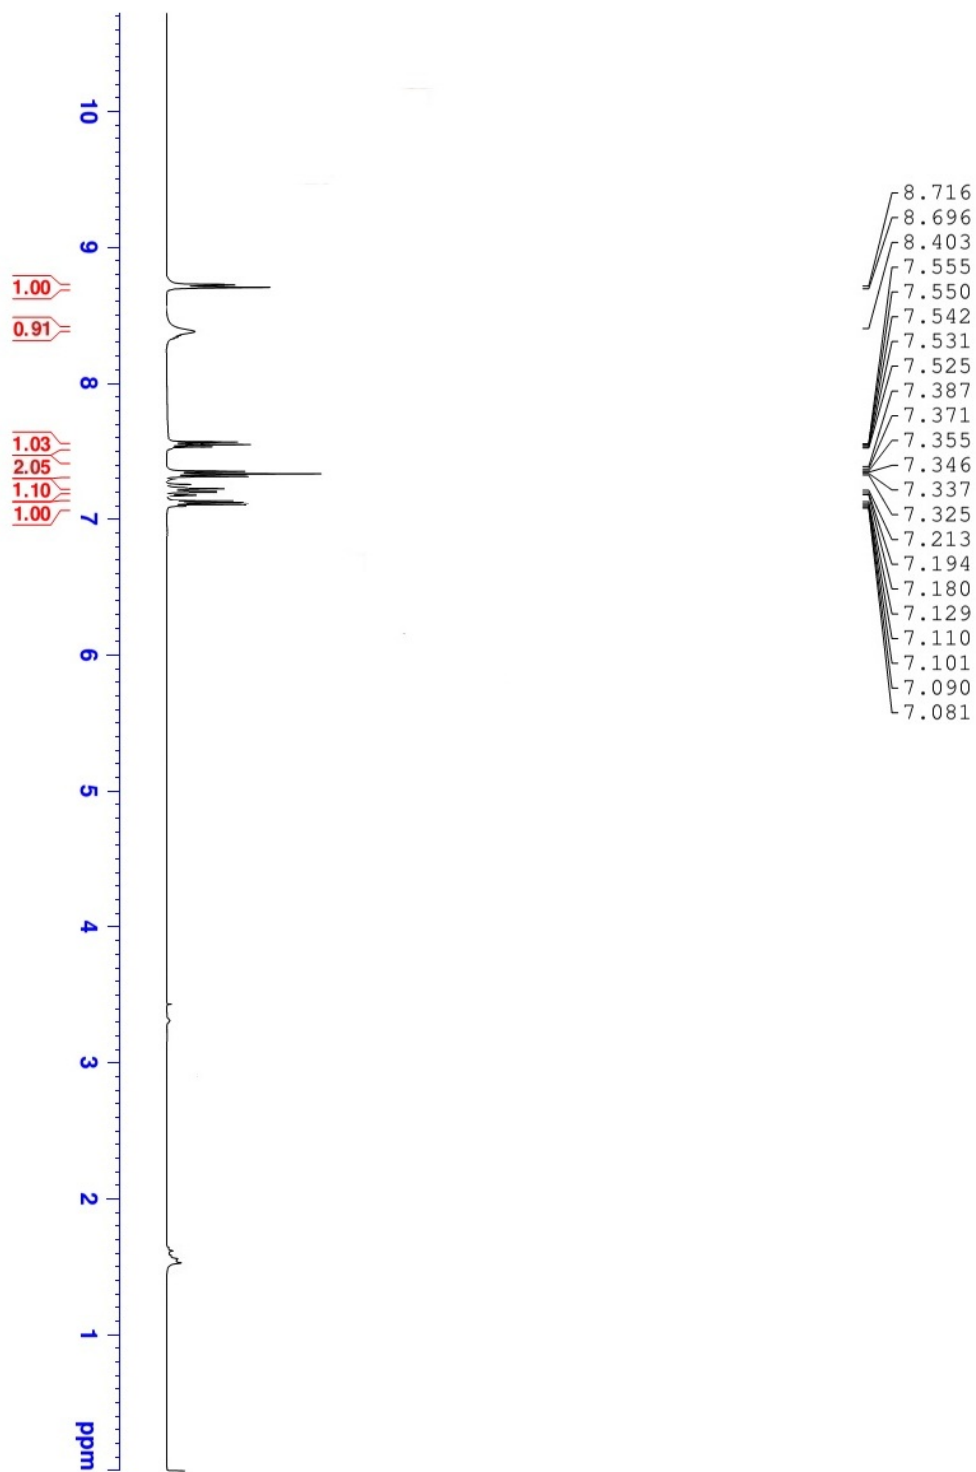

<sup>1</sup>H NMR of Compound E

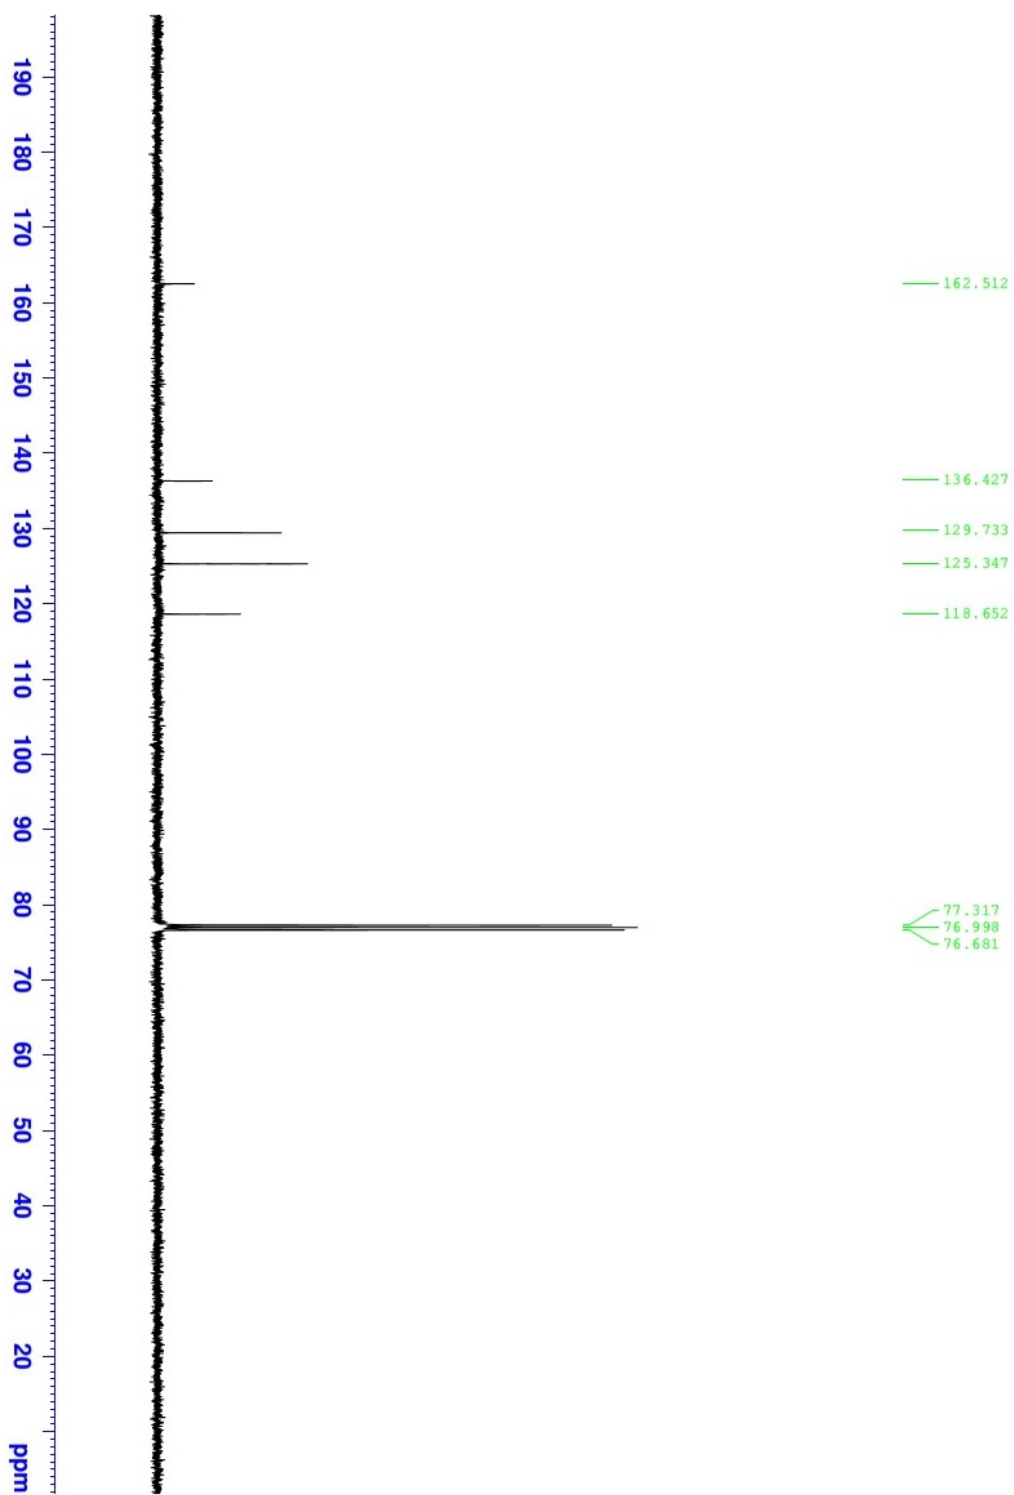

<sup>13</sup>C NMR of Compound E
